# Supplementary material
Source: PubMed Central journal article supplement (PMC7442688)
Supplement: NIHMS1587523-supplement-1.pdf [file NIHMS1587523-supplement-1.pdf]

## Discovery of small-molecule enzyme activators by activity-based protein profiling

Bernard P. Kok<sup>1\*</sup>, Srijana Ghimire<sup>2\*</sup>, Woojoo Kim<sup>1</sup>, Shreyosree Chatterjee<sup>2</sup>, Tyler Johns<sup>1</sup>, Seiya Kitamura<sup>1</sup>, Jerome Eberhardt<sup>3</sup>, Daisuke Ogasawara<sup>2</sup>, , Janice Xu<sup>1</sup>, Ara Sukiasyan<sup>1</sup>, Sean M. Kim<sup>1</sup>, Cristina Godio<sup>1</sup>, Julia M. Bittencourt<sup>1</sup>, Michael Cameron<sup>4</sup>, Andrea Galmozzi<sup>1</sup>, Stefano Forli<sup>3</sup>, Dennis W. Wolan<sup>1</sup>, Benjamin F. Cravatt<sup>2</sup>, Dale L. Boger<sup>2</sup>, Enrique Saez<sup>1</sup>

<sup>1</sup>Department of Molecular Medicine, <sup>2</sup>Department of Chemistry, <sup>3</sup>Department of Integrative Structural and Computational Biology

The Scripps Research Institute, 10550 N. Torrey Pines Road, La Jolla, California 92037

<sup>4</sup>Department of Molecular Medicine

The Scripps Research Institute, 130 Scripps Way, Jupiter, Florida 33458

\*equal contribution

Corresponding authors:

Enrique Saez

[esaez@scripps.edu](mailto:esaez@scripps.edu)

Dale L. Boger

[boger@scripps.edu](mailto:boger@scripps.edu)

### SUPPLEMENTARY INFORMATION

1. Supplementary Tables
2. Supplementary Figures
3. Supplementary Note – Structure-Activity Study & Synthetic Procedures

**Supplementary Table 1.** Small molecule screening data for mouse LYPLAL1

| Category          | Parameter                                | Description                                                                                                                                                                                                                                                                                                                             |
|-------------------|------------------------------------------|-----------------------------------------------------------------------------------------------------------------------------------------------------------------------------------------------------------------------------------------------------------------------------------------------------------------------------------------|
| Assay             | Type of assay                            | Fluorescence polarization                                                                                                                                                                                                                                                                                                               |
|                   | Target                                   | LYPLAL1                                                                                                                                                                                                                                                                                                                                 |
|                   | Primary measurement                      | Purified LYPLAL1 is a serine hydrolase that reacts with fluorophosphonate-rhodamine to change spin rate of free probe compared to LYPLAL1-associated probe.                                                                                                                                                                             |
|                   | Key reagents                             | Fluorophosphonate-rhodamine (FP-Rh), purified recombinant mLYPLAL1, Tris-HCl, NaCl, Pluronic F-127.                                                                                                                                                                                                                                     |
|                   | Assay protocol                           | 9.5 $\mu$ l 4 $\mu$ M mLYPLAL1 in 50 mM Tris-HCl, 150 mM NaCl, 0.01% Pluronic F-127, pH 7.5 incubated with 50 nl 2 mM compounds for 1.5 h at 37°C. 0.5 $\mu$ l 1.5 $\mu$ M FP-Rh probe was added and incubated for 60 min at 37°C followed by end-point fluorescence measurement (Ex. 535 nm, 2 orthogonal measurements at Em. 595 nm). |
|                   | Additional comments                      | Kinetic analysis of purified mLYPLAL1 with FP-Rh for this assay is provided in <b>Extended Data Fig. 1a</b> .                                                                                                                                                                                                                           |
| Library           | Library size                             | 16,000 on 384-well plates as single compounds at 2 mM in DMSO                                                                                                                                                                                                                                                                           |
|                   | Library composition                      | Small molecules < 500 Da and obeying Lipinski's "Rule of 5".                                                                                                                                                                                                                                                                            |
|                   | Source                                   | Maybridge Hitfinder Collection                                                                                                                                                                                                                                                                                                          |
|                   | Additional comments                      |                                                                                                                                                                                                                                                                                                                                         |
| Screen            | Format                                   | 384-well plate                                                                                                                                                                                                                                                                                                                          |
|                   | Concentration(s) tested                  | Final concentration of 10 $\mu$ M                                                                                                                                                                                                                                                                                                       |
|                   | Plate controls                           | DMSO, fluorophosphonate-biotin (FP-biotin, full inhibition).                                                                                                                                                                                                                                                                            |
|                   | Reagent/ compound dispensing system      | Bioraptor FRD™ (Beckman Coulter) for mLYPLAL1 and FP-Rh dispensation. Biomek FX (Beckman Coulter) for library compound dispensation.                                                                                                                                                                                                    |
|                   | Detection instrument and software        | EnVision™ 2014 Multilabel plate reader (PerkinElmer); software: EnVision Workstation v. 1.12.                                                                                                                                                                                                                                           |
|                   | Assay validation/QC                      | Intra- and inter-plate CV were 4.61 and 2.68%, respectively. The average S/B ratio was 1.92.                                                                                                                                                                                                                                            |
|                   | Correction factors                       | Milli-polarization ratio (mP) = $1000 \times (S - G \times P) / (S + G \times P)$ where S = detector channel 2, P = detector channel 1, G = G-factor for channel 1 correction, which is 0.94.                                                                                                                                           |
|                   | Normalization                            | Data is normalized as percent activity, where DMSO = 100%. % activity = $100 \times (\text{Compound} - \text{FP-biotin}) / (\text{DMSO} - \text{FP-biotin})$                                                                                                                                                                            |
|                   | Additional comments                      |                                                                                                                                                                                                                                                                                                                                         |
| Post-HTS analysis | Hit criteria                             | Inhibitors = compounds that decrease activity <60%; activators = compounds that increase activity >140%.                                                                                                                                                                                                                                |
|                   | Hit rate                                 | Inhibitors = 0.53%, Activators = 0.36% for the fluorescence polarization-based ABPP screen.                                                                                                                                                                                                                                             |
|                   | Additional assay(s)                      | An orthogonal assay (gel-based competitive ABPP) was used for hit validation ( <b>Extended Data Fig. 2</b> ). Two additional assays (4-nitrophenyl acetate and 4-umbelliferyl acetate hydrolysis) were used to confirm the top activator hit.                                                                                           |
|                   | Confirmation of hit purity and structure | Purity was assessed by NMR as well as comparison with re-synthesized and purchased hit compound.                                                                                                                                                                                                                                        |
|                   | Additional comments                      | Structure of the initial top validated activator is incorrectly assigned in commercial libraries. Structure of compound <b>4</b> corrected based on X-ray crystal structure ( <b>Fig. 1</b> ).                                                                                                                                          |

**Supplementary Table 2.** Compounds examined in exploration of the 1,2,4-triazole C3 linker

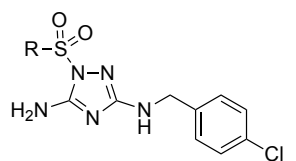

| R                                                                                    | mLYPLAL1<br>EC <sub>50</sub> (fold increase) | hLYPLAL1<br>EC <sub>50</sub> (fold increase) |
|--------------------------------------------------------------------------------------|----------------------------------------------|----------------------------------------------|
|     | >20 (1.0)                                    | nd                                           |
| 78 1-naphthyl                                                                        | 2.4 (1.2)                                    | nd                                           |
| 79 8-quinolyl                                                                        | >20 (1.1)                                    | nd                                           |
| 80 4-MeOPh                                                                           | >20 (1.1)                                    | nd                                           |
| 81 cyclohexyl                                                                        | >20 (1.0)                                    | nd                                           |
| 82  | >20 (1.0)                                    | nd                                           |
| 17  | >20 (1.0)                                    | nd                                           |

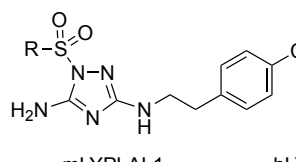

| R                                                                                      | mLYPLAL1<br>EC <sub>50</sub> (fold increase) | hLYPLAL1<br>EC <sub>50</sub> (fold increase) |
|----------------------------------------------------------------------------------------|----------------------------------------------|----------------------------------------------|
|     | >20 (1.0)                                    | nd                                           |
| 83 1-naphthyl                                                                          | 2.1 (1.6)                                    | nd                                           |
| 84 3-ClPh                                                                              | >20 (1.2)                                    | nd                                           |
| 85 3-NO <sub>2</sub> Ph                                                                | 6.2 (2.0)                                    | nd                                           |
| 86 cyclohexyl                                                                          | >20 (1.0)                                    | nd                                           |
| 87  | 2.1 (1.6)                                    | nd                                           |
| 18  | >20 (1.1)                                    | nd                                           |

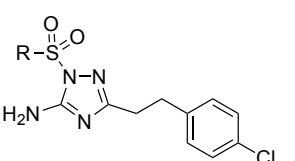

| R                                                                                     | mLYPLAL1<br>EC <sub>50</sub> (fold increase) | hLYPLAL1<br>EC <sub>50</sub> (fold increase) |
|---------------------------------------------------------------------------------------|----------------------------------------------|----------------------------------------------|
| 88  | 9.8 (2.2)                                    | nd                                           |
| 19  | 2.6 (2.0)                                    | nd                                           |
| 89  | 6.5 (1.6)                                    | nd                                           |

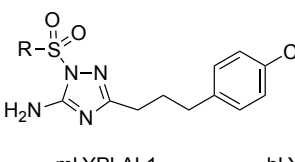

| R                                                                                      | mLYPLAL1<br>EC <sub>50</sub> (fold increase) | hLYPLAL1<br>EC <sub>50</sub> (fold increase) |
|----------------------------------------------------------------------------------------|----------------------------------------------|----------------------------------------------|
| 20  | >20 (1.0)                                    | nd                                           |
| 90 2-naphthyl                                                                          | >20 (1.0)                                    | nd                                           |
| 91 3-MeCOPh                                                                            | >20 (1.0)                                    | nd                                           |
| 92 3-NH <sub>2</sub> COPh                                                              | >20 (1.1)                                    | nd                                           |

**Supplementary Table 3. *In vitro* ADME properties of 4 and 12**

Metabolic stability:

| Half-life in 1 mg/ml hepatic microsomes |                       |       | Intrinsic clearance |                                         |       |
|-----------------------------------------|-----------------------|-------|---------------------|-----------------------------------------|-------|
| Compound                                | Species (T1/2 in min) |       | Compound            | Species (Cl <sub>int</sub> - µl/min/mg) |       |
|                                         | Human                 | Mouse |                     | Human                                   | Mouse |
| sunitinib                               | 37.4                  | 12.8  | sunitinib           | 19                                      | 54    |
| <b>4</b>                                | 3.2                   | 3.0   | <b>4</b>            | 219                                     | 233   |
| <b>12</b>                               | 2.5                   | 2.3   | <b>12</b>           | 273                                     | 303   |

Solubility:

| Compound  | Kinetic Solubility (µM) | Equilibrium Solubility (µM) |
|-----------|-------------------------|-----------------------------|
| <b>4</b>  | <b>6.5</b>              | nd                          |
| <b>12</b> | <b>1.3</b>              | nd                          |

P450 inhibition:

| Compound            | % inhibition at 10 µM |     |     |     |
|---------------------|-----------------------|-----|-----|-----|
|                     | 1A2                   | 2C9 | 2D6 | 3A4 |
| Furafylline (40 µM) | 71                    | 7   | -35 | -22 |
| Sulfaphenazole      | -9                    | 93  | -23 | -20 |
| Quinidine           | -5                    | 15  | 87  | -1  |
| Ketoconazole (1 µM) | -6                    | 24  | -22 | 96  |
| <b>4</b>            | 34                    | 82  | 38  | 91  |
| <b>12</b>           | 32                    | 88  | 32  | 89  |

Plasma protein binding:

| Compound      | (% free) |       | Compound      | (% bound) |       |
|---------------|----------|-------|---------------|-----------|-------|
|               | Human    | Mouse |               | Human     | Mouse |
| <b>4</b>      | <0.1     | 0.2   | <b>4</b>      | >99.9     | 99.8  |
| <b>12</b>     | <0.1     | 0.2   | <b>12</b>     | >99.9     | 99.8  |
| Carbamazepine | 31       | 33.5  | Carbamazepine | 69.0      | 66.5  |
| Ritonavir     | 0.4      | 0.5   | Ritonavir     | 99.6      | 99.5  |

\***12** degraded slowly in plasma. At 24 hr, 10% of the compound was accounted for in human plasma incubations and 40% in mouse plasma incubations

**Supplementary Table 4.** Crystal data and structure refinement for **4**.

| Compound <b>4</b>                 |                                                                                                                                          |
|-----------------------------------|------------------------------------------------------------------------------------------------------------------------------------------|
| Identification code               | boger30_a                                                                                                                                |
| Empirical formula                 | C17 H15 Cl N4 O3 S2                                                                                                                      |
| Formula weight                    | 422.90                                                                                                                                   |
| Temperature                       | 100.0 K                                                                                                                                  |
| Wavelength                        | 0.71073 Å                                                                                                                                |
| Crystal system                    | Triclinic                                                                                                                                |
| Space group                       | P-1                                                                                                                                      |
| Unit cell dimensions              | a = 5.8358(3) Å $\alpha = 104.054(2)^\circ$<br>b = 11.3499(5) Å $\beta = 95.985(2)^\circ$<br>c = 14.0129(6) Å $\gamma = 95.776(2)^\circ$ |
| Volume                            | 887.80(7) Å <sup>3</sup>                                                                                                                 |
| Z                                 | 2                                                                                                                                        |
| Density (calculated)              | 1.582 Mg/m <sup>3</sup>                                                                                                                  |
| Absorption coefficient            | 0.478 mm <sup>-1</sup>                                                                                                                   |
| F(000)                            | 436                                                                                                                                      |
| Crystal size                      | 0.34 x 0.28 x 0.2 mm <sup>3</sup>                                                                                                        |
| Theta range for data collection   | 1.512 to 26.427°                                                                                                                         |
| Index ranges                      | -7<=h<=7, -14<=k<=12, -14<=l<=17                                                                                                         |
| Reflections collected             | 17096                                                                                                                                    |
| Independent reflections           | 3647 [R(int) = 0.0388]                                                                                                                   |
| Completeness to theta = 26.000°   | 99.9 %                                                                                                                                   |
| Absorption correction             | Semi-empirical from equivalents                                                                                                          |
| Max. and min. transmission        | 0.0932 and 0.0604                                                                                                                        |
| Refinement method                 | Full-matrix least-squares on F <sup>2</sup>                                                                                              |
| Data / restraints / parameters    | 3647 / 0 / 244                                                                                                                           |
| Goodness-of-fit on F <sup>2</sup> | 1.050                                                                                                                                    |
| Final R indices [I>2sigma(I)]     | R1 = 0.0300, wR2 = 0.0735                                                                                                                |
| R indices (all data)              | R1 = 0.0372, wR2 = 0.0777                                                                                                                |
| Extinction coefficient            | n/a                                                                                                                                      |
| Largest diff. peak and hole       | 0.413 and -0.314 e.Å <sup>-3</sup>                                                                                                       |

**Supplementary Table 5.** Crystal data and structure refinement for **12**.

|                                   | Compound <b>12</b>                          |                           |
|-----------------------------------|---------------------------------------------|---------------------------|
| Identification code               | SG1-91                                      |                           |
| Empirical formula                 | C17 H14 Cl N5 O2 S3                         |                           |
| Molecular formula                 | C17 H14 Cl N5 O2 S3                         |                           |
| Formula weight                    | 451.96                                      |                           |
| Temperature                       | 100.0 K                                     |                           |
| Wavelength                        | 0.71073 Å                                   |                           |
| Crystal system                    | Monoclinic                                  |                           |
| Space group                       | P 1 21/n 1                                  |                           |
| Unit cell dimensions              | a = 11.0577(6) Å                            | $\alpha = 90^\circ$ .     |
|                                   | b = 5.8200(4) Å                             | $\beta = 96.005(3)^\circ$ |
|                                   | c = 29.2403(19) Å                           | $\gamma = 90^\circ$       |
| Volume                            | 1871.5(2) Å <sup>3</sup>                    |                           |
| Z                                 | 4                                           |                           |
| Density (calculated)              | 1.604 Mg/m <sup>3</sup>                     |                           |
| Absorption coefficient            | 0.565 mm <sup>-1</sup>                      |                           |
| F(000)                            | 928                                         |                           |
| Crystal size                      | 0.317 x 0.291 x 0.255 mm <sup>3</sup>       |                           |
| Crystal color, habit              | Colorless Block                             |                           |
| Theta range for data collection   | 1.400 to 25.740°                            |                           |
| Index ranges                      | -13<=h<=13, -7<=k<=7, -31<=l<=35            |                           |
| Reflections collected             | 23239                                       |                           |
| Independent reflections           | 3566 [R(int) = 0.0581]                      |                           |
| Completeness to theta = 25.000°   | 100.0 %                                     |                           |
| Absorption correction             | Semi-empirical from equivalents             |                           |
| Max. and min. transmission        | 0.0921 and 0.0601                           |                           |
| Refinement method                 | Full-matrix least-squares on F <sup>2</sup> |                           |
| Data / restraints / parameters    | 3566 / 2 / 262                              |                           |
| Goodness-of-fit on F <sup>2</sup> | 1.038                                       |                           |
| Final R indices [I>2sigma(I)]     | R1 = 0.0325, wR2 = 0.0734                   |                           |
| R indices (all data)              | R1 = 0.0451, wR2 = 0.0796                   |                           |
| Extinction coefficient            | n/a                                         |                           |
| Largest diff. peak and hole       | 0.347 and -0.392 e.Å <sup>-3</sup>          |                           |

**Supplementary Table 6.** Crystal data and structure refinement for **34**.

| Compound <b>34</b>                |                                                                                                                                       |
|-----------------------------------|---------------------------------------------------------------------------------------------------------------------------------------|
| Identification code               | SG1-15                                                                                                                                |
| Empirical formula                 | C15 H12 Br Cl N4 O2 S2                                                                                                                |
| Molecular formula                 | C15 H12 Br Cl N4 O2 S2                                                                                                                |
| Formula weight                    | 459.77                                                                                                                                |
| Temperature                       | 100.0 K                                                                                                                               |
| Wavelength                        | 0.71073 Å                                                                                                                             |
| Crystal system                    | Triclinic                                                                                                                             |
| Space group                       | P-1                                                                                                                                   |
| Unit cell dimensions              | a = 5.268(2) Å $\alpha = 80.697(9)^\circ$<br>b = 8.623(3) Å $\beta = 87.437(11)^\circ$<br>c = 19.447(7) Å $\gamma = 87.839(10)^\circ$ |
| Volume                            | 870.5(5) Å <sup>3</sup>                                                                                                               |
| Z                                 | 2                                                                                                                                     |
| Density (calculated)              | 1.754 Mg/m <sup>3</sup>                                                                                                               |
| Absorption coefficient            | 2.772 mm <sup>-1</sup>                                                                                                                |
| F(000)                            | 460                                                                                                                                   |
| Crystal size                      | 0.135 x 0.031 x 0.021                                                                                                                 |
| Crystal color, habit              | Colorless Rod                                                                                                                         |
| Theta range for data collection   | 2.124 to 25.391°                                                                                                                      |
| Index ranges                      | -6<=h<=6, -10<=k<=9, -23<=l<=23                                                                                                       |
| Reflections collected             | 10538                                                                                                                                 |
| Independent reflections           | 3181 [R(int) = 0.0619]                                                                                                                |
| Completeness to theta = 25.000°   | 99.8 %                                                                                                                                |
| Absorption correction             | Semi-empirical from equivalents                                                                                                       |
| Max. and min. transmission        | 0.0916 and 0.0651                                                                                                                     |
| Refinement method                 | Full-matrix least-squares on F <sup>2</sup>                                                                                           |
| Data / restraints / parameters    | 3181 / 0 / 226                                                                                                                        |
| Goodness-of-fit on F <sup>2</sup> | 1.011                                                                                                                                 |
| Final R indices [I>2sigma(I)]     | R1 = 0.0432, wR2 = 0.0738                                                                                                             |
| R indices (all data)              | R1 = 0.0804, wR2 = 0.0826                                                                                                             |
| Extinction coefficient            | n/a                                                                                                                                   |
| Largest diff. peak and hole       | 0.390 and -0.411 e.Å <sup>-3</sup>                                                                                                    |

**Supplementary Table 7. Crystal data and structure refinement for 37.**

|                                   | Compound 37                                 |                            |
|-----------------------------------|---------------------------------------------|----------------------------|
| Identification code               | SG1-11                                      |                            |
| Empirical formula                 | C16 H15 Cl N4 O3 S2                         |                            |
| Molecular formula                 | C16 H15 Cl N4 O3 S2                         |                            |
| Formula weight                    | 410.89                                      |                            |
| Temperature                       | 100.0 K                                     |                            |
| Wavelength                        | 0.71073 Å                                   |                            |
| Crystal system                    | Monoclinic                                  |                            |
| Space group                       | C 1 2/c 1                                   |                            |
| Unit cell dimensions              | a = 20.482(2) Å                             | $\alpha = 90^\circ$        |
|                                   | b = 17.972(2) Å                             | $\beta = 110.176(2)^\circ$ |
|                                   | c = 10.6391(12) Å                           | $\gamma = 90^\circ$        |
| Volume                            | 3675.9(7) Å <sup>3</sup>                    |                            |
| Z                                 | 8                                           |                            |
| Density (calculated)              | 1.485 Mg/m <sup>3</sup>                     |                            |
| Absorption coefficient            | 0.459 mm <sup>-1</sup>                      |                            |
| F(000)                            | 1696                                        |                            |
| Crystal size                      | 0.213 x 0.053 x 0.021 mm <sup>3</sup>       |                            |
| Crystal color, habit              | Colorless Rod                               |                            |
| Theta range for data collection   | 2.119 to 25.395°                            |                            |
| Index ranges                      | -24<=h<=24, -21<=k<=21, -12<=l<=12          |                            |
| Reflections collected             | 21918                                       |                            |
| Independent reflections           | 3384 [R(int) = 0.0499]                      |                            |
| Completeness to theta = 25.000°   | 99.9 %                                      |                            |
| Absorption correction             | Semi-empirical from equivalents             |                            |
| Max. and min. transmission        | 0.0916 and 0.0661                           |                            |
| Refinement method                 | Full-matrix least-squares on F <sup>2</sup> |                            |
| Data / restraints / parameters    | 3384 / 0 / 236                              |                            |
| Goodness-of-fit on F <sup>2</sup> | 1.023                                       |                            |
| Final R indices [I>2sigma(I)]     | R1 = 0.0337, wR2 = 0.0689                   |                            |
| R indices (all data)              | R1 = 0.0518, wR2 = 0.0763                   |                            |
| Extinction coefficient            | n/a                                         |                            |
| Largest diff. peak and hole       | 0.237 and -0.283 e.Å <sup>-3</sup>          |                            |



**Supplementary Table 8.** Crystal data and structure refinement for **78**.

|                                   | Compound <b>78</b>                                                 |         |
|-----------------------------------|--------------------------------------------------------------------|---------|
| Identification code               | SG1-111                                                            |         |
| Empirical formula                 | C <sub>19</sub> H <sub>16</sub> Cl N <sub>5</sub> O <sub>2</sub> S |         |
| Molecular formula                 | C <sub>19</sub> H <sub>16</sub> Cl N <sub>5</sub> O <sub>2</sub> S |         |
| Formula weight                    | 413.88                                                             |         |
| Temperature                       | 100.0 K                                                            |         |
| Wavelength                        | 0.71073 Å                                                          |         |
| Crystal system                    | Orthorhombic                                                       |         |
| Space group                       | Pbca                                                               |         |
| Unit cell dimensions              | a = 24.7536(10) Å                                                  | α = 90° |
|                                   | b = 8.2870(4) Å                                                    | β = 90° |
|                                   | c = 36.1110(13) Å                                                  | γ = 90° |
| Volume                            | 7407.6(5) Å <sup>3</sup>                                           |         |
| Z                                 | 16                                                                 |         |
| Density (calculated)              | 1.484 Mg/m <sup>3</sup>                                            |         |
| Absorption coefficient            | 0.346 mm <sup>-1</sup>                                             |         |
| F(000)                            | 3424                                                               |         |
| Crystal size                      | 0.153 x 0.147 x 0.131 mm <sup>3</sup>                              |         |
| Crystal color, habit              | Colorless Block                                                    |         |
| Theta range for data collection   | 1.645 to 25.350°                                                   |         |
| Index ranges                      | -29 ≤ h ≤ 28, -6 ≤ k ≤ 9, -43 ≤ l ≤ 43                             |         |
| Reflections collected             | 46733                                                              |         |
| Independent reflections           | 6755 [R(int) = 0.0578]                                             |         |
| Completeness to theta = 25.000°   | 99.9 %                                                             |         |
| Absorption correction             | Semi-empirical from equivalents                                    |         |
| Max. and min. transmission        | 0.7453 and 0.5393                                                  |         |
| Refinement method                 | Full-matrix least-squares on F <sup>2</sup>                        |         |
| Data / restraints / parameters    | 6755 / 6 / 529                                                     |         |
| Goodness-of-fit on F <sup>2</sup> | 1.067                                                              |         |
| Final R indices [I > 2σ(I)]       | R1 = 0.0435, wR2 = 0.0865                                          |         |
| R indices (all data)              | R1 = 0.0680, wR2 = 0.0964                                          |         |
| Extinction coefficient            | n/a                                                                |         |
| Largest diff. peak and hole       | 0.307 and -0.396 e.Å <sup>-3</sup>                                 |         |

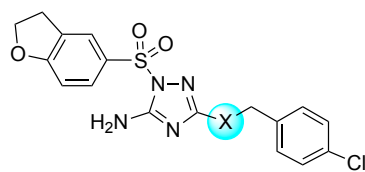

| Compd                | X                 | <sup>a</sup> EC <sub>50</sub> <sup>b</sup> (fold increase) |                 | rel activation<br>HEK293 <sup>c</sup> |
|----------------------|-------------------|------------------------------------------------------------|-----------------|---------------------------------------|
|                      |                   | mLYPLAL1                                                   | hLYPLAL1        |                                       |
| <b>4<sup>d</sup></b> | S                 | 0.49 (2.3)                                                 | 0.44 (2.5)      | 100%                                  |
| <b>15</b>            | NH                | >20 (1.0)                                                  | nd <sup>e</sup> | 0%                                    |
| <b>16</b>            | NHCH <sub>2</sub> | >20 (1.0)                                                  | nd              | 0%                                    |

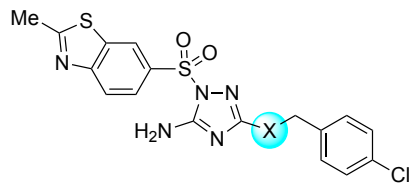

| Compd                 | X                               | <sup>a</sup> EC <sub>50</sub> <sup>b</sup> (fold increase) |                 | rel activation<br>HEK293 <sup>c</sup> |
|-----------------------|---------------------------------|------------------------------------------------------------|-----------------|---------------------------------------|
|                       |                                 | mLYPLAL1                                                   | hLYPLAL1        |                                       |
| <b>12<sup>d</sup></b> | S                               | 0.10 (2.8)                                                 | nd (2.5)        | 206%                                  |
| <b>17</b>             | NH                              | >20 (1.0)                                                  | nd <sup>e</sup> | 1%                                    |
| <b>18</b>             | NHCH <sub>2</sub>               | >20 (1.1)                                                  | nd              | 0%                                    |
| <b>19</b>             | CH <sub>2</sub>                 | 2.6 (2.0)                                                  | nd              | 11%                                   |
| <b>20</b>             | CH <sub>2</sub> CH <sub>2</sub> | >20 (1.0)                                                  | nd              | 1%                                    |

<sup>a</sup>EC<sub>50</sub> (μM). <sup>b</sup>Fold increase in FP-Rh labeling of LYPLAL1 by ABPP. <sup>c</sup>Relative activation of mLYPLAL1 in HEK293 proteome by the compound (10 μM) expressed as a % of **4** (2.5–5 fold activation, 10 μM). <sup>d</sup>Structure determined by X-ray. <sup>e</sup>Not determined.

**Supplementary Figure 1.** Sulfur atom replacements in the C3 linker.

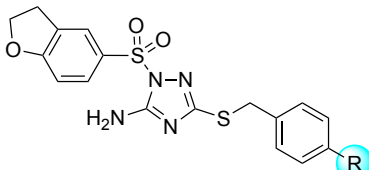

| Compd                | R               | <sup>a</sup> EC <sub>50</sub> <sup>b</sup> (fold increase) |            | rel activation<br>HEK293 <sup>c</sup> |
|----------------------|-----------------|------------------------------------------------------------|------------|---------------------------------------|
|                      |                 | mLYPLAL1                                                   | hLYPLAL1   |                                       |
| <b>4<sup>d</sup></b> | Cl              | 0.49 (2.3)                                                 | 0.44 (2.5) | 100%                                  |
| <b>21</b>            | H               | >20 (1.3)                                                  | 6.3 (2.3)  | 26%                                   |
| <b>22</b>            | Br              | 0.91 (2.4)                                                 | 0.33 (2.4) | 96%                                   |
| <b>23</b>            | I               | 1.2 (1.5)                                                  | 4.3 (2.4)  | 48%                                   |
| <b>24</b>            | Me              | 1.3 (1.8)                                                  | 2.2 (2.4)  | 57%                                   |
| <b>25</b>            | NO <sub>2</sub> | 6.3 (1.3)                                                  | 1.9 (2.5)  | 11%                                   |

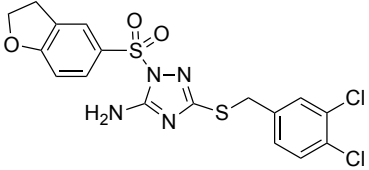

| Compd     | <sup>a</sup> EC <sub>50</sub> <sup>b</sup> (fold increase) |            | rel activation<br>HEK293 <sup>c</sup> |
|-----------|------------------------------------------------------------|------------|---------------------------------------|
|           | mLYPLAL1                                                   | hLYPLAL1   |                                       |
| <b>26</b> | 0.77 (2.2)                                                 | 0.45 (2.4) | 74%                                   |

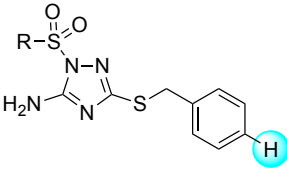

| R                    | mLYPLAL1                                                   | hLYPLAL1                                                   |
|----------------------|------------------------------------------------------------|------------------------------------------------------------|
|                      | <sup>a</sup> EC <sub>50</sub> <sup>b</sup> (fold increase) | <sup>a</sup> EC <sub>50</sub> <sup>b</sup> (fold increase) |
| <b>27</b> 4-FPh      | >20 (1.0)                                                  | >20 (1.2)                                                  |
| <b>28</b> 4-F,2-ClPh | >20 (1.3)                                                  | >20 (1.2)                                                  |
| <b>29</b> 5-F,2-MePh | >20 (1.0)                                                  | >20 (1.2)                                                  |

<sup>a</sup>EC<sub>50</sub> (μM), <sup>b</sup>Fold increase in FP-Rh labeling of LYPLAL1 by ABPP. <sup>c</sup>Relative activation of mLYPLAL1 in HEK293 proteome by the compound (10 μM) expressed as a % of **4** (2.5–5 fold activation, 10 μM). <sup>d</sup>Structure determined by X-ray.

**Supplementary Figure 2.** Importance of the benzyl group and its substituent.

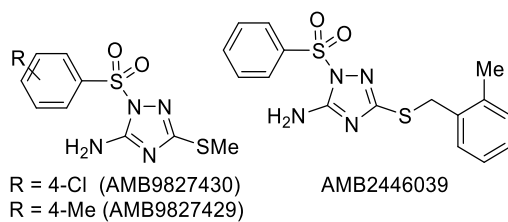

**Supplementary Figure 3.** Representative inactive analogues of **4** probing the importance of the C3 thiobenzyl group. The corresponding compounds containing the 4-chlorobenzylthio substituent are active.

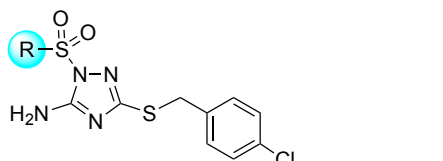

| R                                       | <sup>a</sup> EC <sub>50</sub> <sup>b</sup> (fold increase) |                       | rel activation<br>HEK293 <sup>c</sup> |
|-----------------------------------------|------------------------------------------------------------|-----------------------|---------------------------------------|
|                                         | mLYPLAL1                                                   | hLYPLAL1              |                                       |
| <b>4<sup>d</sup></b>                    | 0.49 (2.3)                                                 | 0.44 (2.5)            | 100% (2.5-5)                          |
| <b>30</b> , Me                          | >20 (1.3)                                                  | >20 (2.5)             | 18%                                   |
| <b>31</b> , <i>i</i> -Pr                | 4.9 (2.1)                                                  | 15 (2.2)              | 34%                                   |
| <b>32</b> , cyclohexyl                  | 0.41 (2.0)                                                 | 0.26 (2.2)            | 29%                                   |
| <b>5</b> , Ph                           | 1.40 (2.3)                                                 | 0.70 (2.7)            | 70%                                   |
| <b>33</b> , 4-FPh                       | 1.1 (2.1)                                                  | 0.57 (3.4)            | nd <sup>e</sup>                       |
| <b>6</b> , 4-ClPh                       | 0.74 (2.0)                                                 | 1.1 (2.3)             | 76%                                   |
| <b>34</b> , 4-BrPh <sup>d</sup>         | 1.1 (2.3)                                                  | 0.57 (2.3)            | 35%                                   |
| <b>35</b> , 4-MePh                      | 0.76 (2.2)                                                 | 0.37 (2.2)            | 21%                                   |
| <b>36</b> , 4-EtPh                      | 0.80 (1.9)                                                 | nd <sup>e</sup> (2.2) | 45%                                   |
| <b>37</b> , 4-MeOPh <sup>d</sup>        | 0.97 (2.4)                                                 | 0.30 (2.2)            | 63%                                   |
| <b>38</b> , 4-CNPh                      | 0.77 (2.2)                                                 | nd (2.1)              | 83%                                   |
| <b>39</b> , 4-O <sub>2</sub> NPh        | 0.32 (2.4)                                                 | nd (2.1)              | 53%                                   |
| <b>40</b> , 4-PhPh                      | >20 (1.3)                                                  | nd (1.7)              | 8%                                    |
| <b>7</b> , 3-ClPh                       | 0.19 (2.7)                                                 | nd (2.5)              | 140%                                  |
| <b>41</b> , 3-MeOPh                     | 0.62 (2.4)                                                 | nd (nd)               | 73%                                   |
| <b>42</b> , 3-O <sub>2</sub> NPh        | 0.17 (2.7)                                                 | 0.11 (2.5)            | 128%                                  |
| <b>8</b> , 3-MeO <sub>2</sub> CPh       | 0.16 (3.1)                                                 | nd (nd)               | 168%                                  |
| <b>9</b> , 3-EtO <sub>2</sub> CPh       | 0.35 (2.7)                                                 | nd (nd)               | 145%                                  |
| <b>43</b> , 3-MeO <sub>2</sub> C,2-MePh | 0.38 (1.8)                                                 | nd (nd)               | 40%                                   |
| <b>44</b> , 3-AcPh                      | 0.48 (2.4)                                                 | nd (1.4)              | 52%                                   |
| <b>45</b> , 3-NH <sub>2</sub> COPh      | 1.4 (2.4)                                                  | nd (1.6)              | 121%                                  |
| <b>46</b> , 3-AcNHPH                    | 0.65 (2.8)                                                 | nd (nd)               | 98%                                   |
| <b>10</b> , 3-BzNHPH                    | 0.37 (3.1)                                                 | nd (nd)               | 152%                                  |
| <b>47</b> , 3-PhPh                      | 0.48 (2.2)                                                 | nd (2.1)              | 45%                                   |
| <b>48</b> , 2-FPh                       | 0.81 (2.6)                                                 | nd (2.3)              | 66%                                   |
| <b>49</b> , 2-O <sub>2</sub> NPh        | 1.3 (2.4)                                                  | nd (2.0)              | 38%                                   |
| <b>50</b> , 1-naphthyl                  | 0.25 (2.5)                                                 | nd (nd)               | 68%                                   |
| <b>51</b> , 2-naphthyl                  | 0.10 (1.6)                                                 | nd (1.6)              | 11%                                   |
| <b>52</b>                               | 0.79 (2.5)                                                 | nd (2.2)              | 49%                                   |
| <b>53</b>                               | 1.3 (2.5)                                                  | nd (2.4)              | 44%                                   |
| <b>54</b> , 3-furanyl                   | >20 (2.4)                                                  | nd (nd)               | 49%                                   |
| <b>55</b> , 3-thienyl                   | 0.55 (2.7)                                                 | nd (nd)               | 47%                                   |
| <b>56</b> , 2-thienyl                   | 0.56 (1.8)                                                 | 0.65 (3.2)            | nd                                    |
| <b>57</b> , 5-Ph-2-thienyl              | 0.21 (1.6)                                                 | nd (1.8)              | 16%                                   |
| <b>58</b> , 5-(2-py)-2-thienyl          | 0.06 (1.4)                                                 | 0.02 (1.5)            | nd                                    |
| <b>59</b>                               | 2.2 (2.0)                                                  | 0.71 (1.9)            | 32%                                   |
| <b>60</b>                               | 2.4 (1.3)                                                  | nd (1.8)              | 7%                                    |
| <b>61</b>                               | nd (1.1)                                                   | nd (nd)               | 23%                                   |
| <b>62</b>                               | 0.19 (1.3)                                                 | nd (nd)               | 5%                                    |
| <b>63</b> , 8-quinolyl                  | 0.94 (2.4)                                                 | nd (nd)               | 53%                                   |
| <b>64</b> , NMe-indol-4-yl              | 0.25 (1.4)                                                 | nd (nd)               | 19%                                   |
| <b>65</b> , 5-benzimidazolyl            | 0.38 (2.7)                                                 | nd (nd)               | 124%                                  |
| <b>66</b> , 2-benzthiazolyl             | >20 (1.1)                                                  | nd (nd)               | 5%                                    |
| <b>67</b> , 4-benzthiazolyl             | 0.43 (2.1)                                                 | nd (nd)               | 47%                                   |
| <b>11</b> , 6-benzthiazolyl             | 0.25 (2.8)                                                 | 0.35 (2.8)            | 170%                                  |
| <b>68</b> , 4-benzoxadiazoyl            | 0.44 (2.0)                                                 | 0.23 (3.0)            | nd                                    |
| <b>12<sup>d</sup></b>                   | 0.10 (2.8)                                                 | nd (2.5)              | 206%                                  |
| <b>13</b>                               | 0.19 (2.9)                                                 | nd (nd)               | 183%                                  |
| <b>14</b>                               | 0.06 (2.7)                                                 | nd (nd)               | 243%                                  |
| <b>69</b>                               | 0.74 (2.7)                                                 | nd (nd)               | 89%                                   |
| <b>70</b>                               | 0.38 (2.4)                                                 | nd (nd)               | 78%                                   |

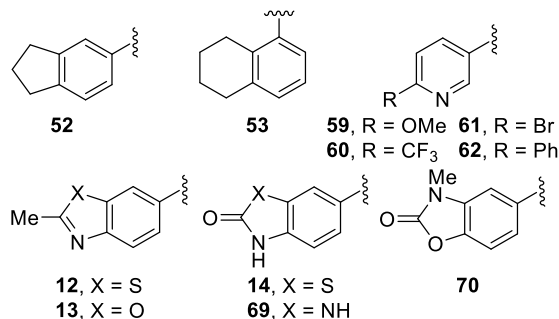

<sup>a</sup>EC<sub>50</sub> (μM). <sup>b</sup>Fold increase in FP-Rh labeling of LYPLAL1 by ABPP. <sup>c</sup>Relative activation of mLYPLAL1 in HEK293 proteome by the compound (10 μM) expressed as a % of **4** (2.5–5 fold activation, 10 μM). <sup>d</sup>Structure confirmed by X-ray. <sup>e</sup>Not determined.

**Supplementary Figure 4. Modifications to the N1 sulfonamide substituent.**

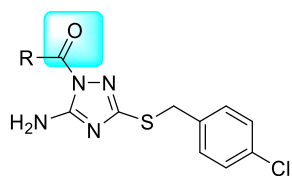

| R                       | mLYPLAL1                      |                              | hLYPLAL1                      |                              |
|-------------------------|-------------------------------|------------------------------|-------------------------------|------------------------------|
|                         | <sup>a</sup> EC <sub>50</sub> | <sup>b</sup> (fold increase) | <sup>a</sup> EC <sub>50</sub> | <sup>b</sup> (fold increase) |
| 71 Ph                   | >20                           | (1.0)                        | >20                           | (1.0)                        |
| 72 4-NO <sub>2</sub> Ph | >20                           | (1.0)                        | nd <sup>c</sup>               |                              |
| 73 4-FPh                | >20                           | (1.0)                        | nd                            |                              |
| 74 3-FPh                | >20                           | (1.0)                        | nd                            |                              |
| 75 3-NO <sub>2</sub> Ph | >20                           | (1.0)                        | nd                            |                              |
| 76 cyclohexyl           | >20                           | (1.0)                        | nd                            |                              |
| 77 1-naphthyl           | >20                           | (1.0)                        | nd                            |                              |

<sup>a</sup>EC<sub>50</sub> (μM). <sup>b</sup>Fold increase in FP-Rh labeling of LYPLAL1 by ABBP. <sup>c</sup>Not determined.

### Supplementary Figure 5. N1 amide versus sulfonamide substitution

### Uncropped gels from Fig. 2

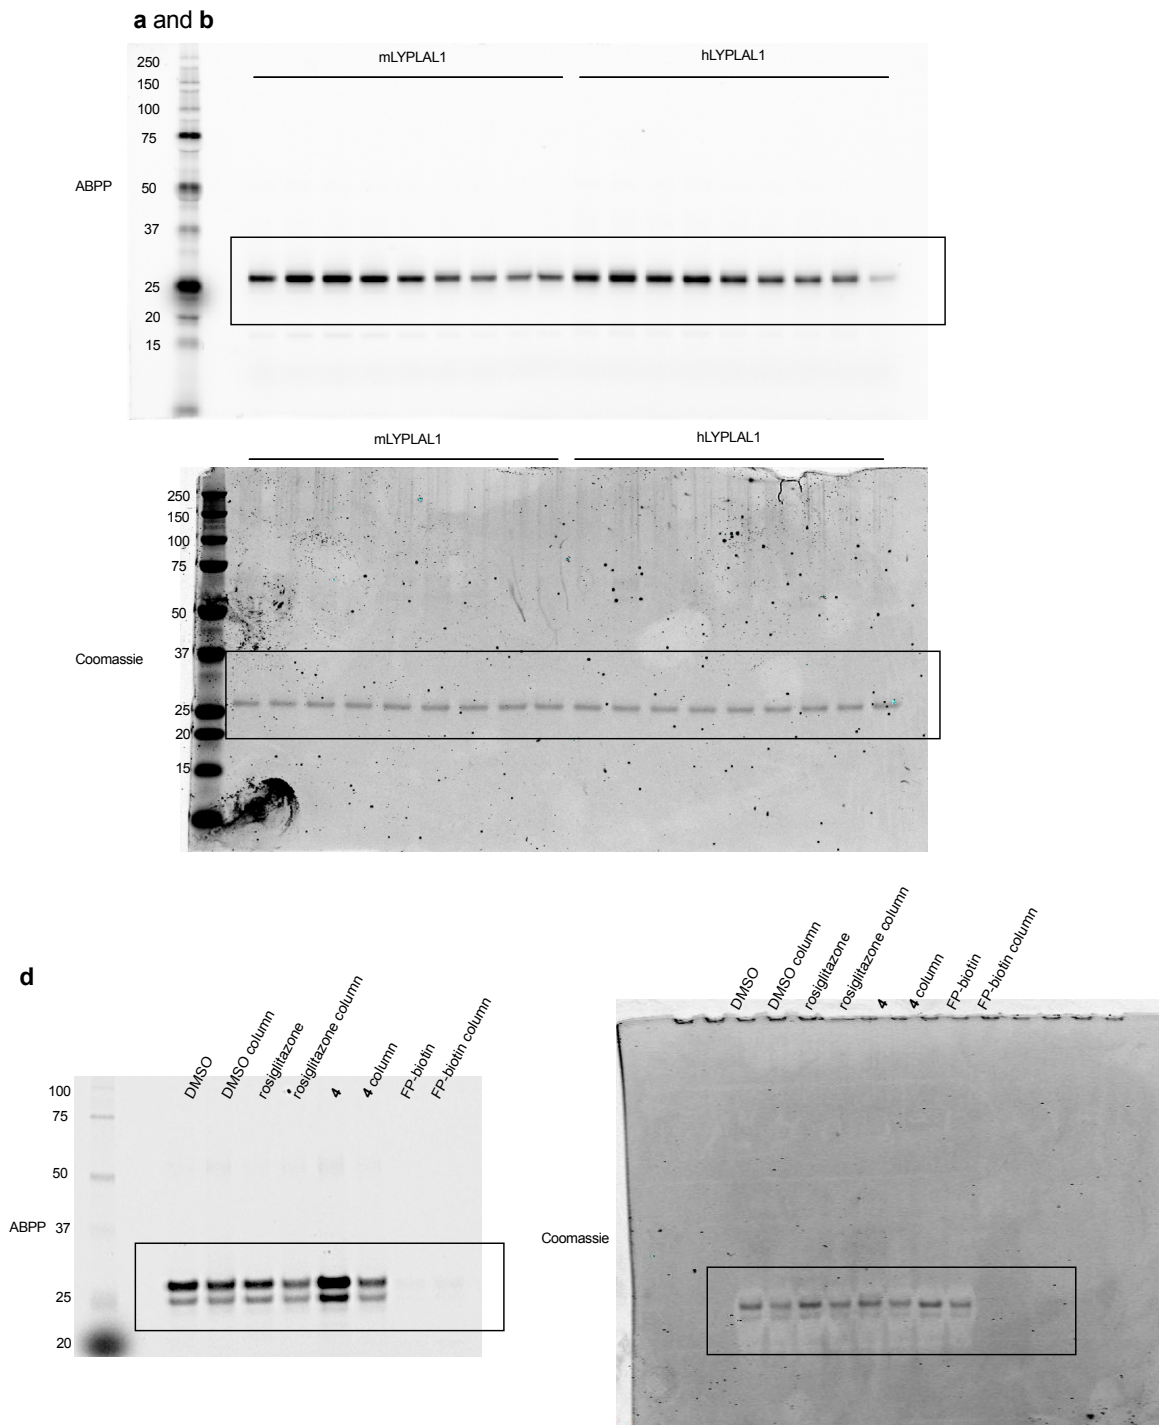

**Supplementary Figure 6.** Uncropped gels. Boxes indicate data shown in the respective main figure panels.

### Uncropped gels from Fig. 4

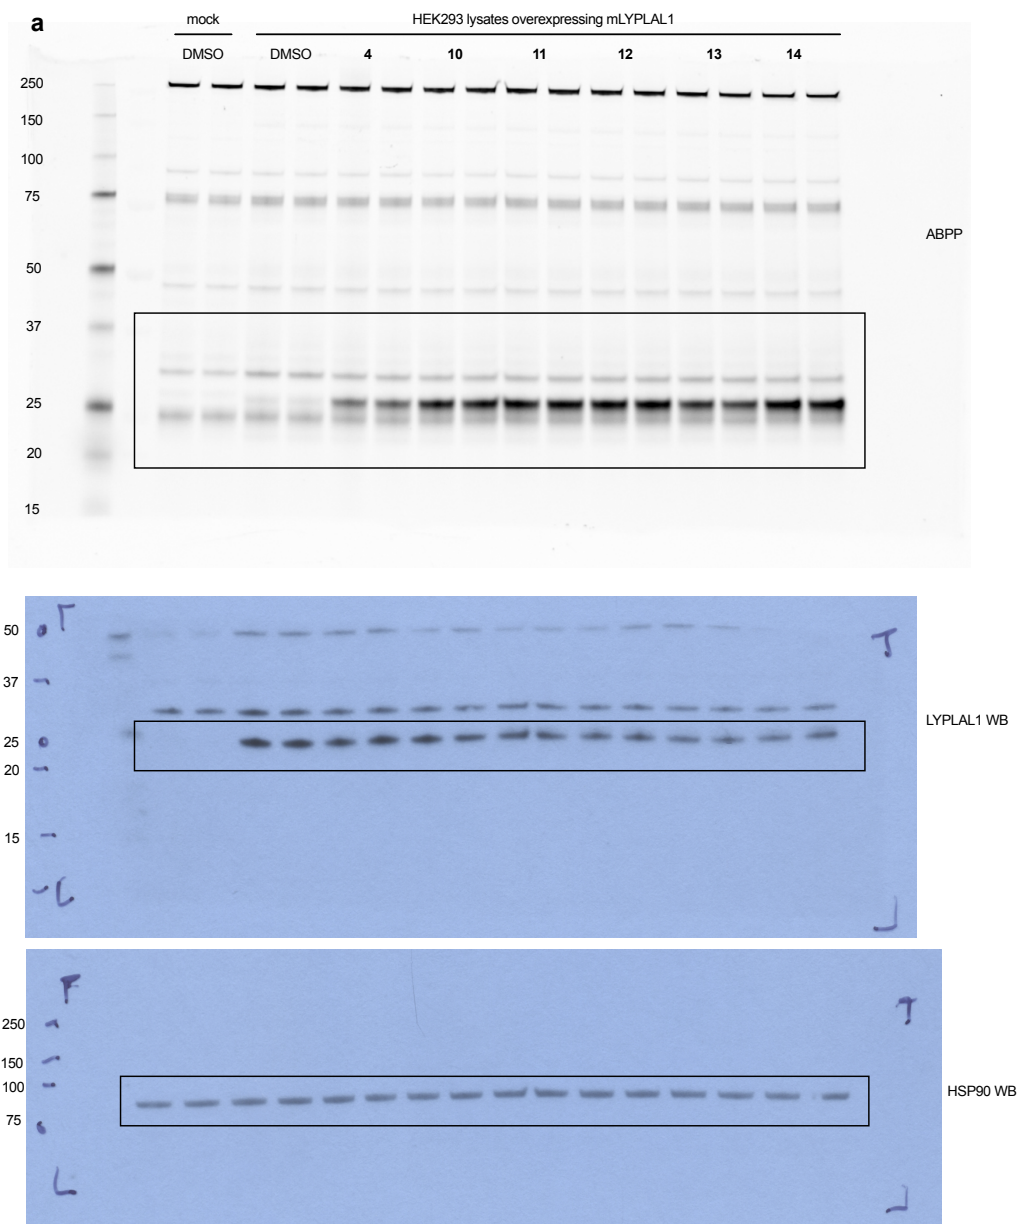

Supplementary Figure 6 (cont.)



Uncropped gels from Fig. 5

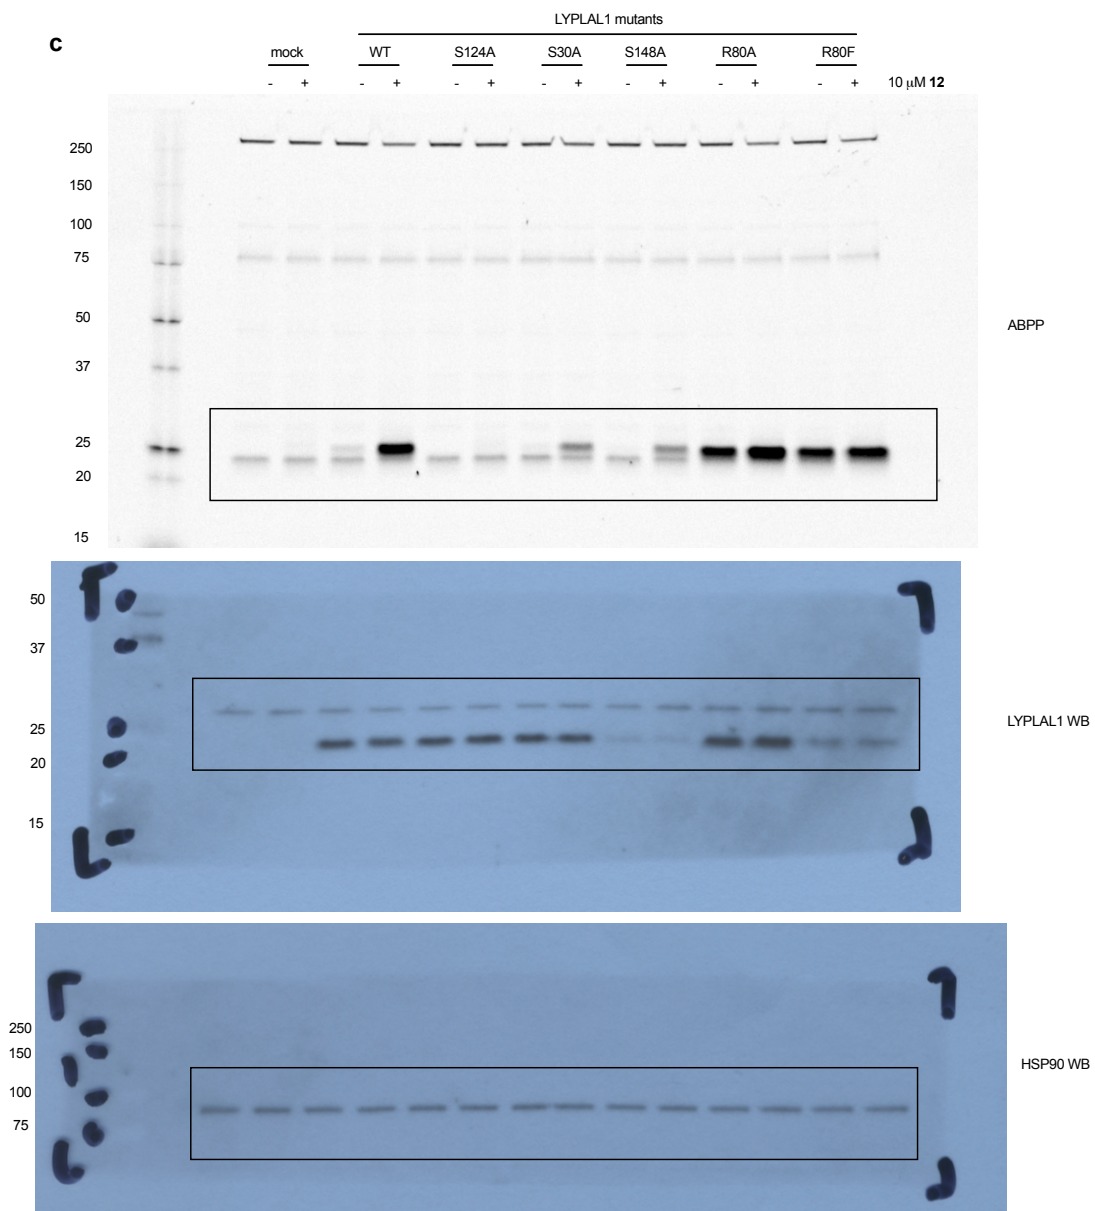

Supplementary Figure 6 (cont.)

Uncropped gels from Fig. 6

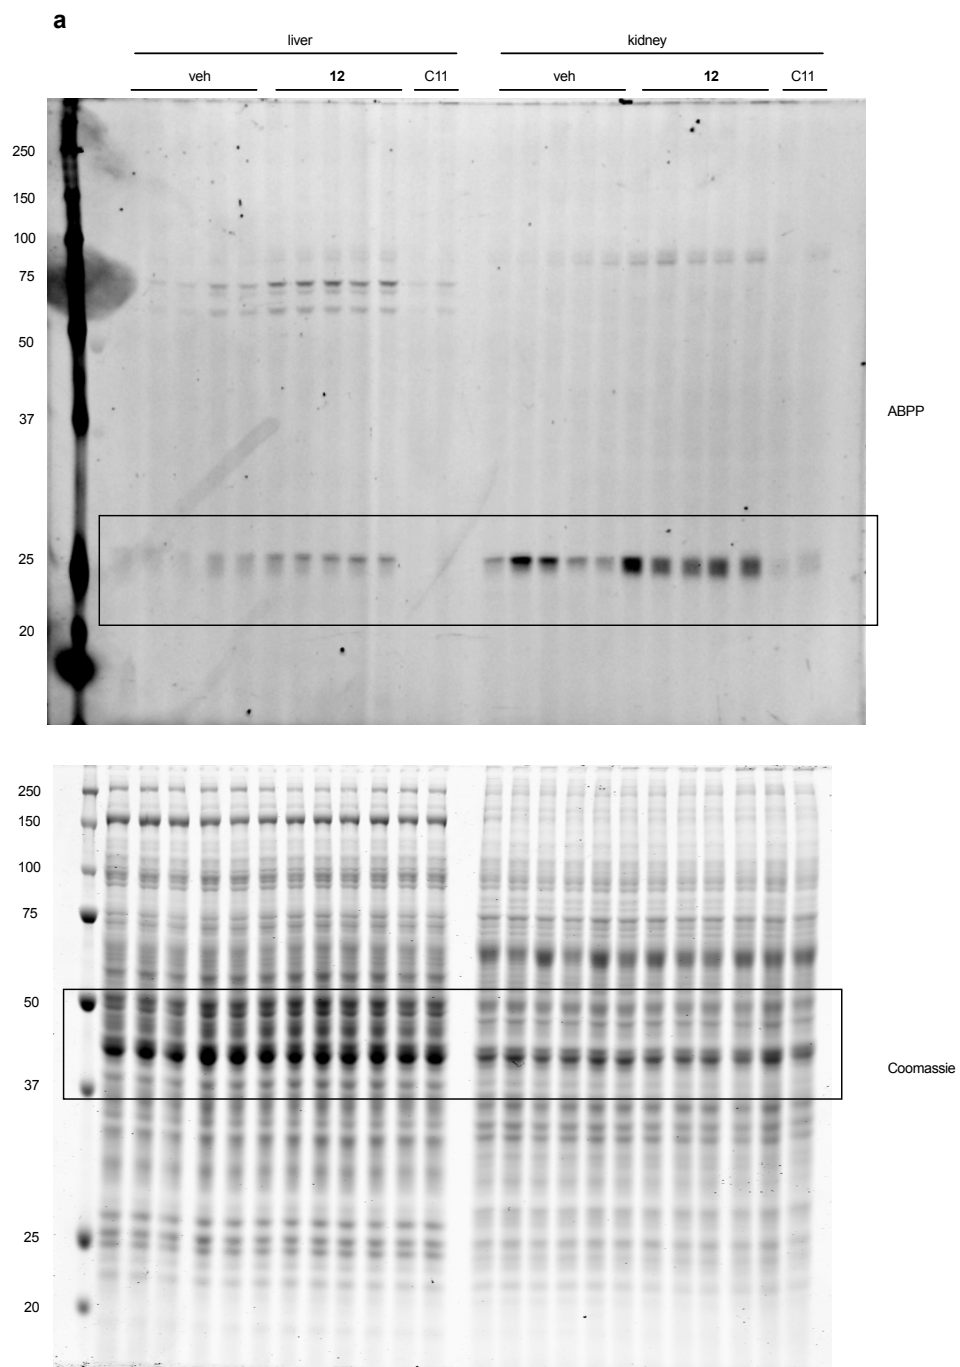

Supplementary Figure 6 (cont.)

Uncropped gels from Extended Data Fig. 2

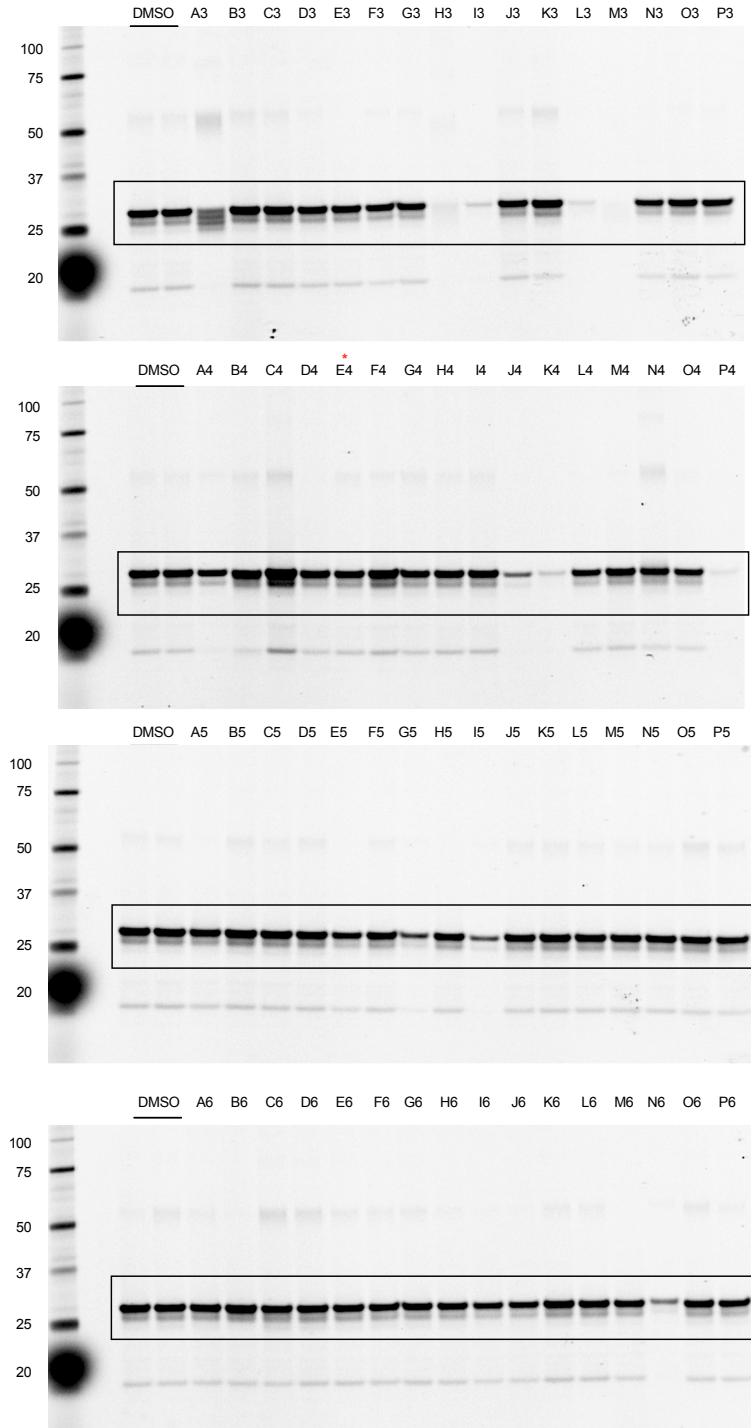

Supplementary Figure 6 (cont.)

Uncropped gels from Extended Data Fig. 2 (continued)

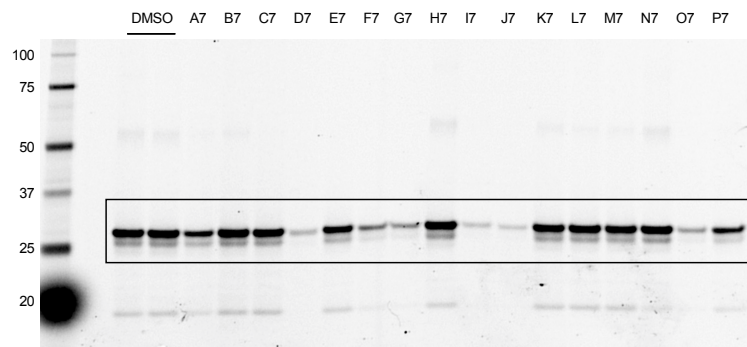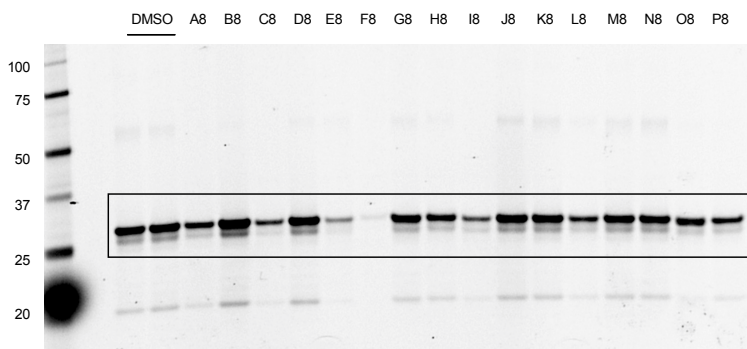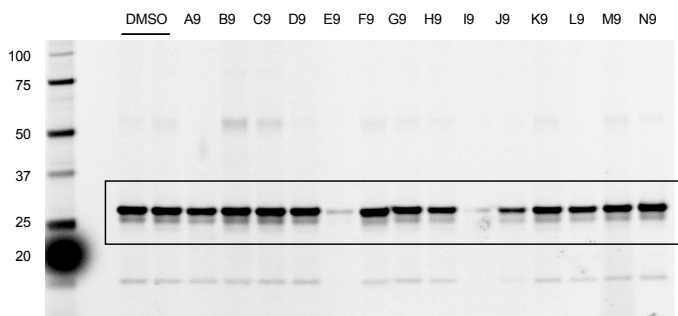

Supplementary Figure 6 (cont.)

Uncropped gels from Extended Data Fig. 5

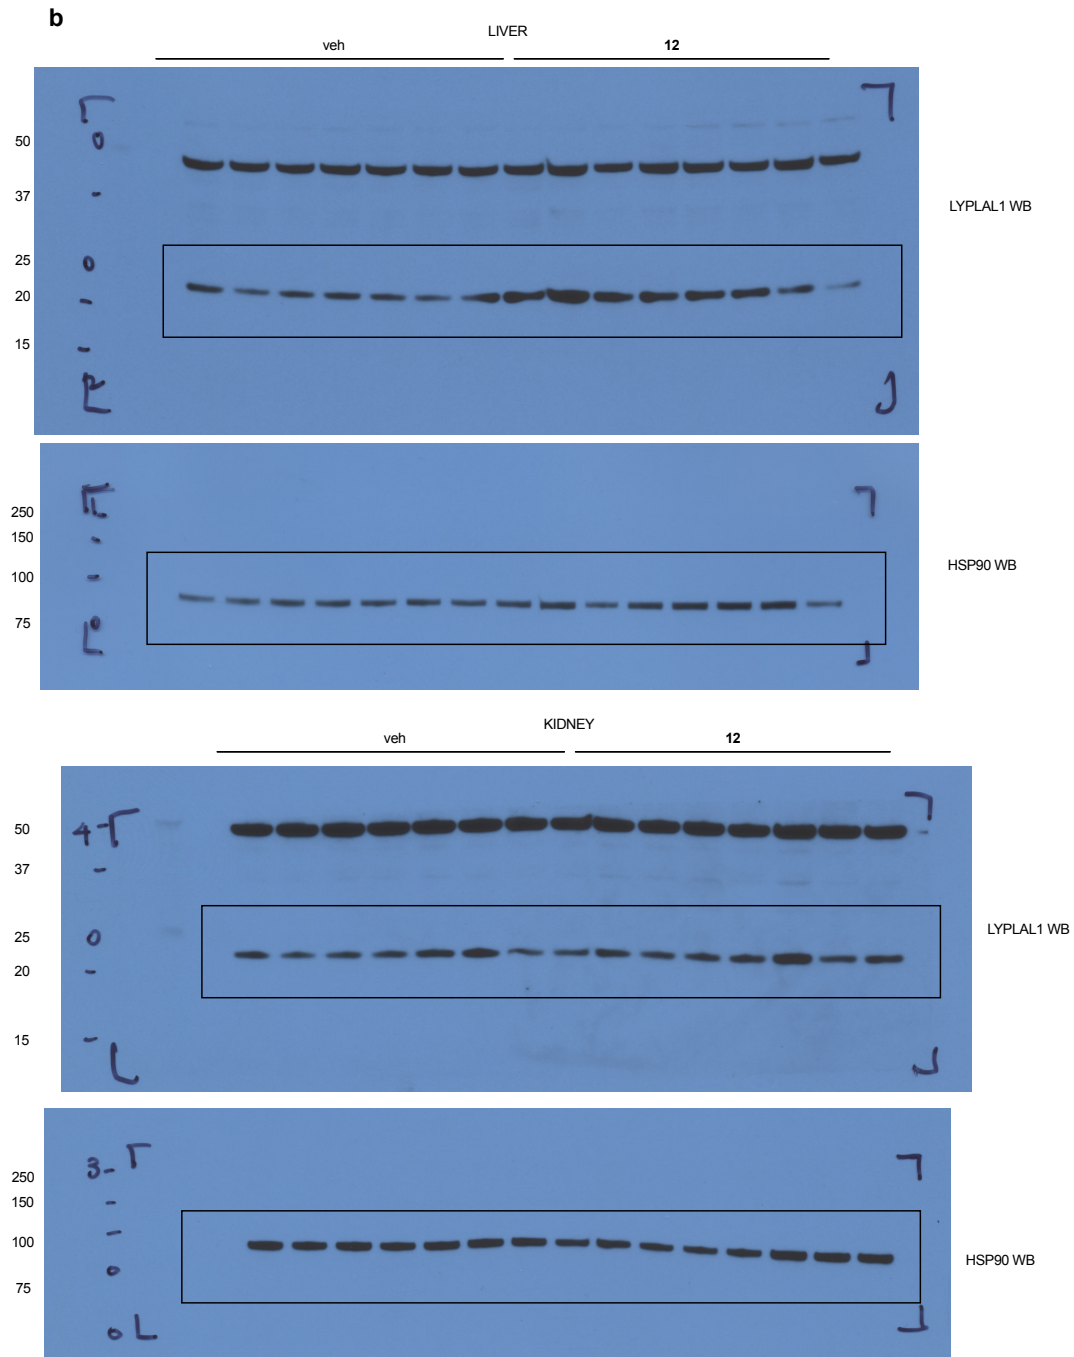

Supplementary Figure 6 (cont.)

Uncropped gel from Extended Data Fig. 6

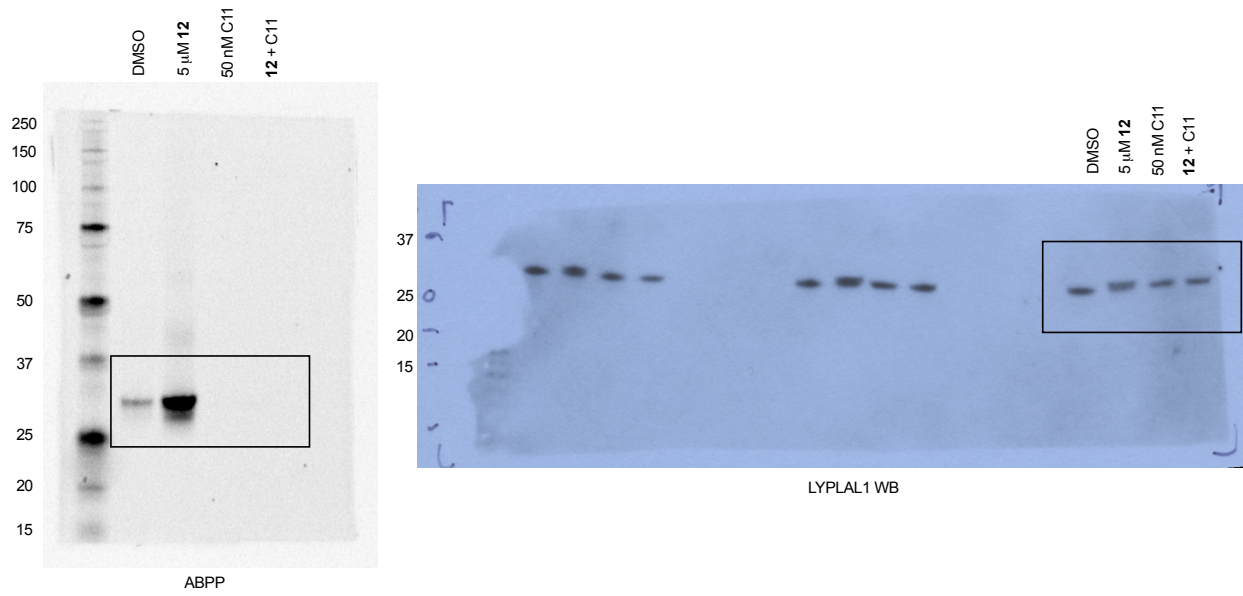

Supplementary Figure 6 (cont.)

## Structure-Activity Study

To our knowledge, this represents the first report of the discovery and optimization of enzyme activation by a small molecule using ABPP. Further, it was conducted on an enzyme whose endogenous substrates are unknown. Because inhibitors of this enzyme were found to increase glucose production in primary hepatocytes<sup>35</sup>, a property that *in vivo* would exacerbate metabolic disease, stimulation of LYPLAL1 activity might be predicted to ameliorate metabolic dysfunction. With this goal in mind, we set out to define the structural features of **4** (which we have named PAL-4) responsible for LYPLAL1 activation and conducted an initial structure-activity relationship study to explore and improve this activity. This analysis was performed with compound assessments against purified mLYPLAL1, often with additional assessments against purified hLYPLAL1. We have not seen substantial differences in activity between mLYPLAL1 and hLYPLAL1 with this compound series. Compounds were prepared by approaches identical to that detailed for **4** in **Fig. 1** and involved sulfonylation or acylation of **3** or related 5-amino-1,2,4-triazoles as the last step. The C3 4-chlorobenzylthio substituent proved key to the activity of compounds. This was initially examined with compounds **15** and **16** that not only contain the lead compound dihydrobenzofuran-5-sulfonyl substituent, but also other N1 sulfonyl substituents that proved more active, including one shown in **Supplementary Fig. 1**. Replacement of the sulfur atom (S) in the linker to the 4-chlorophenyl group with a nitrogen (NH) or a methylene (CH<sub>2</sub>) led to a complete loss in activity (NH, **15** and **17**) or >25-fold loss in activity (CH<sub>2</sub>, **19** vs. **12**). To ensure that this was not due to the larger size of the sulfur atom, approaching the size of CH<sub>2</sub>CH<sub>2</sub>, analogues with NHCH<sub>2</sub> and CH<sub>2</sub>CH<sub>2</sub> replacements were prepared and examined. These proved to even less active or inactive (**Supplementary Fig. 1** and **Supplementary Table 2**).

The importance of the 4-chlorophenyl group was established with the representative series **21-25**, where **4** was found to be the most active compound in the set examined (**Supplementary Fig. 2**). Removal of the 4-chloro substituent (**21**) led to a substantial (>10-40 fold) reduction in the potency of the LYPLAL1 activator, while its replacement with conservative alternative substituents reduced (**23-25**) or perhaps maintained (**22**) this activity. Interestingly, the 3,4-dichlorophenyl analogue **26** essentially maintained both the efficacy and potency of **4**, suggesting there may be opportunities to further modulate the activity and properties of the lead structure with additional modifications.

What was clear from this series and additional compounds also examined at an early stage was that: (1) the phenyl group was required for activity since the corresponding C3 thiomethyl analogues were inactive (**Supplementary Fig. 3**), (2) not all closely related thiobenzyl substituents conveyed activity (e.g., 2-MePhCH<sub>2</sub>S-, **Supplementary Fig. 3**), (3) the 4-chloro substituent on the benzyl group substantially enhanced potency and was the most effective of the small set of substituents examined (**Supplementary Fig. 2**), and (4) the sulfur atom in the linker essentially was required (**Supplementary Fig. 1**).

By contrast, the N1 sulfonamide proved to be a group that could be extensively modified with maintenance or improvements in the potency (EC<sub>50</sub>) and occasionally the efficacy (fold increase) of the compound (**Supplementary Fig. 4**). Although a simple methylsulfonamide (**30**) was largely inactive, larger aliphatic (**31**) and the cyclohexyl (**32**) sulfonamides were active, nearly matching the activity of **4**. Phenylsulfonamide **5** nearly matched the potency of **4** and approached its efficacy. As a result, a range of substituted phenylsulfonamides were explored (**5-10** and **33-49**) and found to display good activity that was widely tolerant of the nature (electron-withdrawing or electron-donating), size, polarity, and position of the added substituent. Typically, substituents at the meta position were better tolerated and often led to greater enhancements in activity. Several such compounds (**7-10**) exhibited improved potencies (EC<sub>50</sub> = 0.19, 0.16, 0.35 and 0.37 μM) and improved activations (2.7, 3.1, 2.7 and 3.1-fold) over **4**. Bicyclic aromatic sulfonamides (**50-53**), and mono and bicyclic heterocyclic sulfonamides (**11-14** and **51-70**) were also generally, but not always, well tolerated. The latter bicyclic heterocyclic series examined typically matched or exceeded the potency of **4**, and several substantially surpassed the potency of **4** with three (**12-**

**14**) exhibiting both improved potencies ( $EC_{50} = 0.060\text{-}0.19 \mu\text{M}$  or  $60\text{-}190 \text{ nM}$ ) and superb activations of 2.7 to 2.9-fold.

Finally, a series of N1 amides **71-77** versus sulfonamides were prepared for examination and all were found to be inactive (**Supplementary Fig. 5**), indicating that the sulfonamide moiety plays an integral role in the modulation of the enzyme activation.

These studies provided a range of compounds with which the impact of activating LYPLAL1 enzymatic activity could be further studied. To complement our work using pure LYPLAL1 protein, mLYPLAL1 was overexpressed in HEK293 cells and activation of the enzyme examined by gel-based ABPP in total proteome prepared from transfected cells. In this way, we could determine the extent to which mLYPLAL1 activation would be observed even in a complex proteome where competitive binding to other proteins might adversely impact enzyme binding and activation. For an initial screen, this was conducted at a single arbitrary concentration of compound ( $10 \mu\text{M}$ ) under defined conditions where the lead compound **4** was found to display substantial activation and a prominent increase (typically 2.5 to 5-fold) in FP-rhodamine labeling of the gel band corresponding to mLYPLAL1. Interestingly, the compounds, including **4**, generally were found to enhance LYPLAL1 labeling and activation better in the complex proteome than in assays with the purified enzyme. For the results reported in **Supplementary Fig. 4**, the activation displayed by the analogues in the HEK293 proteome has been normalized to the FP-rhodamine labeling observed with **4** (normalized to 100%, 2.5 to 5-fold activation). In general, the results in the complex HEK293 proteome followed those observed with the purified enzyme where the more potent and more efficacious analogues (**7-14**) exceeded the activity of **4** observed under these conditions and several additional analogues (**45** and **65**) further differentiated themselves from **4** itself. Impressive improvements were observed in this regard with **11-14**, which displayed substantial 2 to 3-fold enhancements in mLYPLAL1 activation over **4** itself (2.5 to 5-fold enhancement) in the presence of the HEK293 proteome.

We also determined the basic *in vitro* ADME properties of **4** and **12** (**Supplementary Table 3**). Given that these properties are not auspicious for use of **4** or **12** *in vivo*, we used ABPP to directly assess target engagement in tissues. In spite of its poor *in vitro* ADME profile, a single dose of **12** ( $100 \text{ mg/kg}$ ) increased LYPLAL1 activity ~2 fold in mouse liver and kidney (**Fig. 6a**).

## Synthetic Procedures

1. General Procedures
2. Synthesis of candidate LYPLAL1 activator cores
  - a) 3-Amino-5-(4-chlorobenzyl)thio-1,2,4-triazole synthesis
  - b) 1,2,4-Triazole C2 and C3 linker intermediates synthesis
  - c) 1,2,4-Triazole C1 and C2 amino substituted intermediates synthesis
3. General procedure for sulfonylation or acylation

### 1. General procedures

All commercial reagents were used without further purification unless otherwise noted. THF was distilled prior to use. All reactions were performed in oven-dried ( $200^{\circ}\text{C}$ ) glassware and under an inert atmosphere of anhydrous  $\text{N}_2$  unless otherwise noted. Anhydrous acetonitrile and N,N-dimethylformamide were purchased from Acros Organics. Column chromatography was performed with silica gel 60. TLC was performed on Whatman silica gel ( $250 \mu\text{m}$ ) F254 glass plates and spots were visualized by UV. PTLC was performed on Whatman silica gel ( $250$  and  $500 \mu\text{m}$ ) F254 glass plates.  $^1\text{H}$  NMR was recorded on a Bruker 500 MHz spectrometer. Chemical shifts are reported in ppm ( $\delta$ ) from an internal standard of residual  $\text{CHCl}_3$  ( $\delta 7.26$  for  $^1\text{H}$ ) or DMSO



( $\delta$  2.50 for  $^1\text{H}$ ). Coupling constants ( $J$ ) (H,H) are given in Hz.  $^1\text{H}$  NMR data are reported as follows: chemical shift ( $\delta$ ), multiplicity (br = broad, s = singlet, d = doublet, t = triplet, q = quartet, m = multiplet), coupling constant, and integration. Mass spectra were obtained on an Agilent G1969A ESI-TOF mass spectrometer (high resolution) or Agilent Technologies LC/MSD-SL (low resolution), and the detected masses given as  $m/z$  with  $m$  representing the molecular ion. The purity of assayed compounds was confirmed to >95% by  $^1\text{H}$  NMR.

## 2. Synthesis of candidate LYPLAL1 activator cores

### 2a. 5-Amino-3-(4-chlorobenzyl)thio-1,2,4-triazole (**3**)

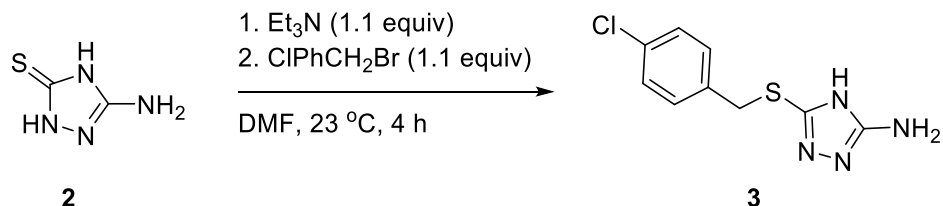

A solution of 5-amino-3-mercapto-1,2,4-triazole (**2**, 1.0 equiv, 8.61 mmol, 1.0 g) in DMF (12 mL) was treated with triethylamine (1.10 equiv, 9.47 mmol, 1.33 mL) dropwise at room temperature and stirred for 15 min. 4-Chlorobenzyl bromide (1.10 equiv, 9.47 mmol, 1.9 g) was added and the mixture was stirred for 4 h at room temperature. The solvent was evaporated to dryness and the residue was dissolved in ethyl acetate, washed with water and saturated aqueous NaCl, dried over anhydrous Na<sub>2</sub>SO<sub>4</sub> and concentrated. Purification by flash column chromatography (SiO<sub>2</sub>, 75% EtOAc/hexanes) afforded **3** (1.97 g, 95%) as a white solid.  $^1\text{H}$  NMR (DMSO-*d*<sub>6</sub>, 500 MHz)  $\delta$  7.37–7.32 (m, 4H), 6.04 (s, 2H), 4.18 (s, 2H). HRMS-ESI-TOF  $m/z$  calculated for C<sub>9</sub>H<sub>10</sub>ClN<sub>4</sub>S<sup>+</sup> [ $M + \text{H}^+$ ]: 241.0309, found: 241.0314.

### 2b. 1,2,4-Triazole C2 and C3 linker intermediates synthesis

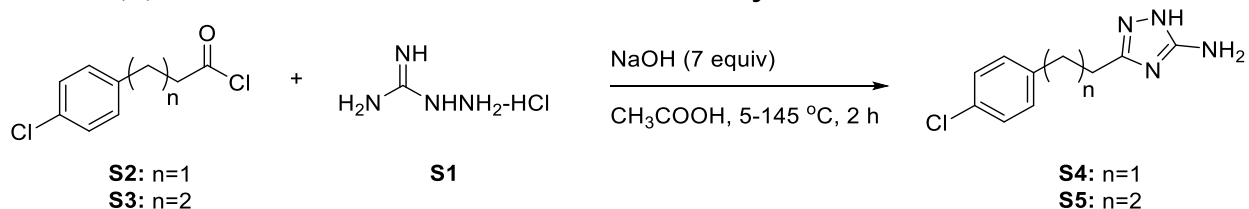

**S4**: Aminoguanidine hydrochloride (**S1**, 2.0 equiv, 0.98 mmol, 108 mg) was powdered using a mortar pestle and mixed with 3-(4-chlorophenyl)propanoyl chloride (**S2**, 1.0 equiv, 0.49 mmol, 100 mg) in a microwave tube. The tube was heated (145–150°C) for 15 min in an oil bath and allowed to cool to room temperature. The reaction mixture was dissolved by the addition of saturated aqueous sodium hydroxide and warmed at reflux for 30 min. The reaction mixture was cooled to room temperature, neutralized by addition of glacial acetic acid, and cooled to 5 °C to complete precipitation. The precipitate was collected by filtration, washed with cold water and then recrystallized from acetonitrile. The acetonitrile was removed, and the residue was dissolved in ethyl acetate, dried with anhydrous Na<sub>2</sub>SO<sub>4</sub>, and concentrated to obtain the product as a white solid.  $^1\text{H}$  NMR (DMSO-*d*<sub>6</sub>, 400 MHz)  $\delta$  11.57 (s, 1H), 7.30 (d,  $J = 8.3$  Hz, 2H), 7.22 (d,  $J = 8.3$  Hz, 2H), 5.78 (s, 2H), 2.89 (t,  $J = 7.0$  Hz, 2H), 2.67 (br s, 2H). LRMS-ESI  $m/z$  calculated for C<sub>10</sub>H<sub>12</sub>ClN<sub>4</sub><sup>+</sup> [ $M + \text{H}^+$ ]: 223.1, found: 223.0

**S5** was prepared in the same manner as **S4** from aminoguanidine hydrochloride (**S1**) and 4-(4-chlorophenyl)butanoyl chloride (**S3**) and was obtained as a white solid (400 mg, 81%).  $^1\text{H}$  NMR (CDCl<sub>3</sub>, 500 MHz)  $\delta$  7.25 (d,  $J = 8.4$  Hz, 2H), 7.11 (d,  $J = 8.3$  Hz, 2H), 4.18 (s, 2H), 2.64 (p,  $J =$

7.7 Hz, 4H), 2.04 (p,  $J = 7.5$  Hz, 2H). LRMS-ESI  $m/z$  calculated for  $C_{11}H_{14}ClN_4^+$  [ $M + H^+$ ]: 237.1, found: 237.0.

### 2c. 1,2,4-Triazole C1 and C2 amino substituted intermediates synthesis

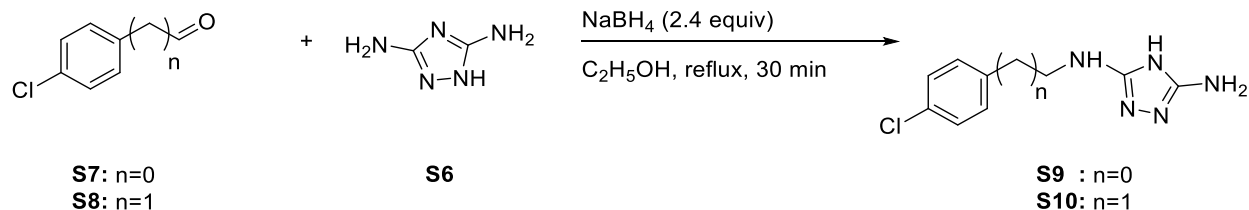

**S9:** A solution of 3,5-diamino-1,2,4-triazole (**S6**, 1.1 equiv, 2.02 mmol, 200 mg) in ethanol (1.0 mL) was treated with 4-chlorobenzaldehyde (**S7**, 1.0 equiv, 1.8 mmol, 257 mg) in ethanol (1 mL) at room temperature and the mixture was warmed at reflux for 1 h. The reaction mixture was cooled to room temperature,  $NaBH_4$  (1.36 equiv, 2.75 mmol, 104 mg) was added and the mixture was warmed at reflux for 30 min. The ethanol volume was reduced, and water was added. A white solid formed that was collected by filtration. The obtained solid was recrystallized from a small volume of ethanol to provide the product as a white solid (137 mg, 34%).  $^1H$  NMR (DMSO- $d_6$ , 500 MHz)  $\delta$  10.70 (s, 1H), 7.34–7.30 (m, 4H), 6.07 (br s, 1H), 5.37 (br s, 2H), 4.38 (d,  $J = 6.0$  Hz, 2H). LRMS-ESI  $m/z$  calculated for  $C_9H_{11}ClN_5^+$  [ $M + H^+$ ]: 224.1, found: 224.0

**S10** was prepared in the same manner as **S9** from 3,5-diamino-1,2,4-triazole (**S6**, 1.1 equiv, 2.02 mmol, 200 mg) and 2-(4-chlorophenyl)acetaldehyde (**S8**, 1.0 equiv, 1.82 mmol, 280 mg). The crude product was purified by flash chromatography ( $SiO_2$ , 5% MeOH/ $CH_2Cl_2$ ) and **S10** was obtained as a white solid (45 mg, 10%).  $^1H$  NMR (DMSO- $d_6$ , 500 MHz)  $\delta$  10.71 (s, 1H), 7.33 (d,  $J = 8.2$  Hz, 2H), 7.23 (d,  $J = 8.3$  Hz, 2H), 5.32 (br s, 2H), 3.19 (m, 2H), 2.77 (t,  $J = 7.3$  Hz, 2H). LRMS-ESI  $m/z$  calculated for  $C_{10}H_{13}ClN_5^+$  [ $M + H^+$ ]: 238.1, found: 238.0.

### 3. General procedure for sulfonylation or acylation

A stirred solution of **3** (1.0 equiv, 0.21 mmol, 50 mg) in acetonitrile (2 mL) was treated with triethylamine (1.2 equiv, 0.25 mmol, 35  $\mu$ L) dropwise at 0°C. The desired sulfonyl chloride or acyl chloride (1.2 equiv) was then added, and the mixture was stirred at room temperature overnight. The solvent was removed and the crude product purified by column chromatography ( $SiO_2$ , EtOAc/hexanes).

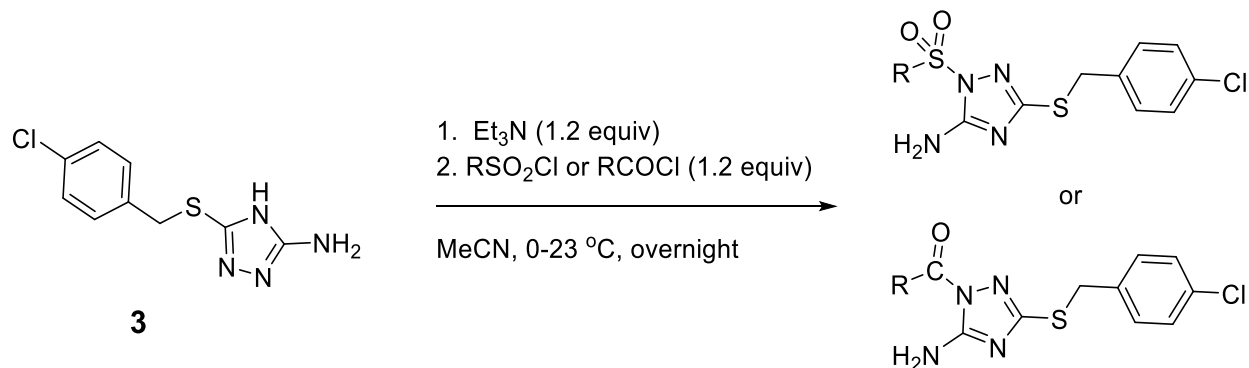

**Compound 4:** 3-((4-chlorobenzyl)thio)-1-((2,3-dihydrobenzofuran-5-yl)sulfonyl)-5-amino-1H-1,2,4-triazole. Trivial name: PAL-4 (Pharmacological Activator of LYPLAL1-4).

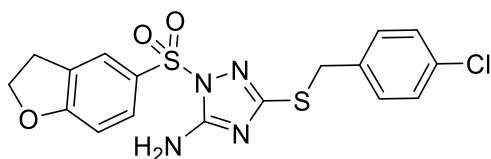

Compound **4** was prepared from 2,3-dihydrobenzofuran-5-sulfonyl chloride (1.2 equiv, 0.25 mmol, 54 mg) using the general procedure. Flash chromatography (SiO<sub>2</sub>, 40% EtOAc/hexanes) yielded the desired product as a white solid (30 mg, 34%). <sup>1</sup>H NMR (CDCl<sub>3</sub>, 500 MHz) δ 7.75 (dd, *J* = 8.5, 2.2 Hz, 1H), 7.71 (m, 1H), 7.25 (d, *J* = 8.6 Hz, 2H), 7.19 (d, *J* = 8.6 Hz, 2H), 6.86 (d, *J* = 8.5 Hz, 1H), 5.77 (s, 2H), 4.73 (t, *J* = 8.7 Hz, 2H), 4.18 (s, 2H), 3.26 (t, *J* = 8.8 Hz, 2H). <sup>13</sup>C NMR (CDCl<sub>3</sub>, 125 MHz) δ 166.10, 161.63, 156.23, 136.00, 133.20, 130.53, 130.51, 129.25, 128.60, 127.64, 125.50, 110.11, 72.92, 34.66, 28.98. HRMS-ESI-TOF *m/z* calculated for C<sub>17</sub>H<sub>16</sub>ClN<sub>4</sub>O<sub>3</sub>S<sub>2</sub><sup>+</sup> [M + H<sup>+</sup>]: 423.0347, found: 423.0351.

This compound is also commercially available from Ambinter (AMB2745087) and Aurora Chemicals (K13.701.587).

The structure of **4** was confirmed by X-ray structure determination (CCDC 1825320; **Supplementary Table 4**).

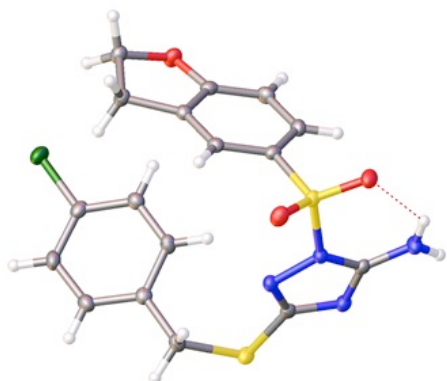

**Compound 12: 3-((4-chlorobenzyl)thio)-1-((2-methylbenzo[d]thiazol-6-yl)sulfonyl)-5-amino-1H-1,2,4-triazole.** Trivial name: **PAL-12 (Pharmacological Activator of LYPLAL1-12)**.

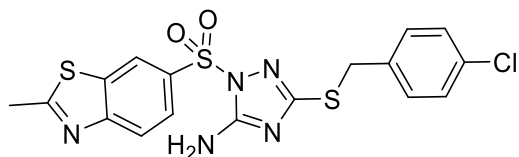

Compound **12** was prepared from 2-methyl-1,3-benzothiazole-6-sulfonyl chloride (1.2 equiv, 0.25 mmol, 62 mg) using the general procedure. Flash chromatography (SiO<sub>2</sub>, 50% EtOAc/hexanes) yielded the desired product as a white solid. <sup>1</sup>H NMR (CDCl<sub>3</sub>, 500 MHz) δ 8.47 (d, *J* = 1.7 Hz, 1H), 8.06 (d, *J* = 8.6 Hz, 1H), 7.95 (dd, *J* = 8.6, 1.7 Hz, 1H), 7.30 (d, *J* = 8.4 Hz, 2H), 7.11 (d, *J* = 8.4 Hz, 2H), 5.93 (s, 2H), 4.16 (s, 2H), 2.93 (s, 3H). <sup>13</sup>C-NMR (CDCl<sub>3</sub>, 125 MHz) δ 173.54, 162.34, 157.43, 156.42, 136.53, 135.76, 133.25, 132.45, 130.37, 128.59, 125.33, 123.46, 122.84, 34.61, 20.82. HRMS-ESI-TOF *m/z* calculated for C<sub>17</sub>H<sub>15</sub>ClN<sub>5</sub>O<sub>2</sub>S<sub>3</sub><sup>+</sup> [M + H<sup>+</sup>]: 452.0071, found: 452.0060.

The structure of **12** was confirmed by X-ray structure determination (CCDC 1825321; **Supplementary Table 5**).

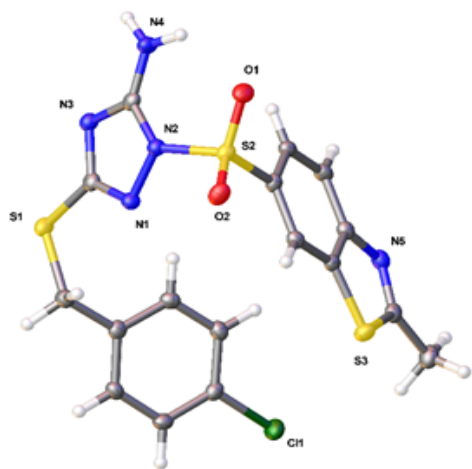

Compounds **27** (Z1410911355), **28** (Z1410911378), and **29** (Z1410911371) were purchased from Enamine.

**Compound 30: 3-((4-chlorobenzyl)thio)-1-(methylsulfonyl)-5-amino-1*H*-1,2,4-triazole**

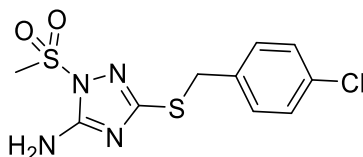

Compound **30** was prepared from methylsulfonyl chloride (1.2 equiv, 0.25 mmol, 20  $\mu$ L) using the general procedure. Flash chromatography (SiO<sub>2</sub>, 40% EtOAc/hexanes) yielded the desired product as a white solid (28 mg, 42%). <sup>1</sup>H NMR (CDCl<sub>3</sub>, 500 MHz)  $\delta$  7.32 (m, 4H), 4.43 (s, 2H), 3.36 (s, 3H). HRMS-ESI-TOF *m/z* calculated for C<sub>10</sub>H<sub>12</sub>ClN<sub>4</sub>O<sub>2</sub>S<sub>2</sub><sup>+</sup> [M - H<sup>+</sup>]: 316.9939, found: 316.9936.

**Compound 31: 3-((4-chlorobenzyl)thio)-1-(isopropylsulfonyl)-5-amino-1*H*-1,2,4-triazole**

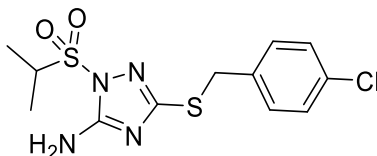

Compound **31** was prepared from propane-2-sulfonyl chloride (1.2 equiv, 0.25 mmol, 30  $\mu$ L) using the general procedure. Flash chromatography (SiO<sub>2</sub>, 50% EtOAc/hexanes) yielded the desired product as a white solid (56 mg, 79%). <sup>1</sup>H NMR (CDCl<sub>3</sub>, 500 MHz)  $\delta$  7.34 (d, *J* = 8.3 Hz, 2H), 7.26 (d, *J* = 8.2 Hz, 2H), 5.67 (s, 2H), 4.25 (s, 2H), 3.65 (m, 1H), 1.34 (d, *J* = 6.9 Hz, 6H). HRMS-ESI-TOF *m/z* calculated for C<sub>12</sub>H<sub>16</sub>ClN<sub>4</sub>O<sub>2</sub>S<sub>2</sub><sup>+</sup> [M + H<sup>+</sup>]: 347.0398, found: 347.0401.

**Compound 32: 3-((4-chlorobenzyl)thio)-1-(cyclohexylsulfonyl)-5-amino-1*H*-1,2,4-triazole**

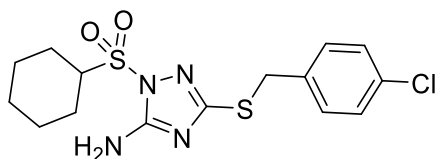

Compound **32** was prepared from cyclohexylsulfonyl chloride (1.2 equiv, 0.25 mmol, 35  $\mu$ L) using the general procedure. Flash chromatography (SiO<sub>2</sub>, 30% EtOAc/hexanes) yielded the desired product as a white solid (62 mg, 77%). <sup>1</sup>H NMR (CDCl<sub>3</sub>, 500 MHz)  $\delta$  7.36 (d, *J* = 8.5 Hz, 2H), 7.26 (d, *J* = 8.4 Hz, 2H), 5.65 (s, 2H), 4.24 (s, 2H), 3.35 (tt, *J* = 12.2, 3.4 Hz, 1H), 1.90 (m, 4H), 1.50 (qd, *J* = 12.5, 3.0 Hz, 2H), 1.21 (m, 4H). LRMS-ESI *m/z* calculated for C<sub>15</sub>H<sub>20</sub>ClN<sub>4</sub>O<sub>2</sub>S<sub>2</sub><sup>+</sup> [*M* + H<sup>+</sup>]: 387.1, found: 387.0.

**Compound 5: 3-((4-chlorobenzyl)thio)-1-(phenylsulfonyl)-5-amino-1*H*-1,2,4-triazole**

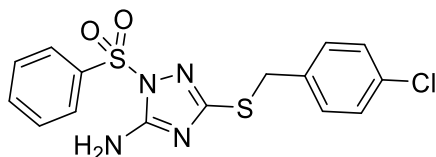

Compound **5** was prepared from phenylsulfonyl chloride (1.2 equiv, 0.25 mmol, 32  $\mu$ L) using the general procedure. Flash chromatography (SiO<sub>2</sub>, 40% EtOAc/hexanes) yielded the desired product as a white solid. <sup>1</sup>H NMR (CDCl<sub>3</sub>, 500 MHz)  $\delta$  7.92 (m, 2H), 7.71 (tt, *J* = 7.6, 1.2 Hz, 1H), 7.55 (m, 2H), 7.24 (m, 2H), 7.18 (m, 2H), 5.83 (s, 2H), 4.18 (s, 2H). HRMS-ESI-TOF *m/z* calculated for C<sub>15</sub>H<sub>14</sub>ClN<sub>4</sub>O<sub>2</sub>S<sub>2</sub><sup>+</sup> [*M* + H<sup>+</sup>]: 381.0241, found: 381.0242.

This compound is also commercially available from Ambinter (AMB2745084).

**Compound 33: 3-((4-chlorobenzyl)thio)-1-((4-fluorophenyl)sulfonyl)-5-amino-1*H*-1,2,4-triazole**

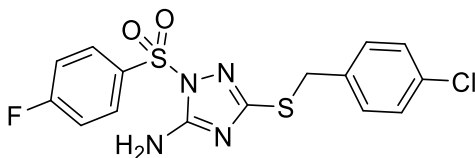

Compound **33** was prepared from 4-fluorophenylsulfonyl chloride (1.2 equiv, 0.25 mmol, 29  $\mu$ L) using the general procedure. Flash chromatography (SiO<sub>2</sub>, 30% EtOAc/hexanes) yielded the desired product as a white solid. <sup>1</sup>H NMR (CDCl<sub>3</sub>, 500 MHz)  $\delta$  7.93 (m, 2H), 7.26 (m, 2H), 7.22 (m, 4H), 5.82 (s, 2H), 4.18 (s, 2H). LRMS-ESI *m/z* calculated for C<sub>15</sub>H<sub>13</sub>ClFN<sub>4</sub>O<sub>2</sub>S<sub>2</sub><sup>+</sup> [*M* + H<sup>+</sup>]: 398.0, found: 399.0.

This compound is also commercially available from Ambinter (AMB2745085).

**Compound 6: 3-((4-chlorobenzyl)thio)-1-((4-chlorophenyl)sulfonyl)-5-amino-1*H*-1,2,4-triazole**

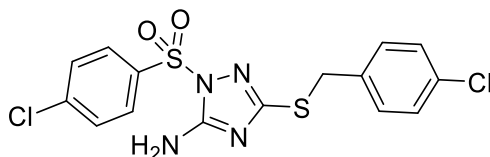

Compound **6** was prepared from 4-chlorophenylsulfonyl chloride (1.2 equiv, 0.25 mmol, 48 mg) using the general procedure. Flash chromatography (SiO<sub>2</sub>, 40% EtOAc/hexanes) yielded the desired product as a white solid (72 mg, 83%). <sup>1</sup>H NMR (CDCl<sub>3</sub>, 500 MHz)  $\delta$  7.84 (d, *J* = 8.8 Hz, 2H), 7.51 (d, *J* = 8.6 Hz, 2H), 7.26 (d, *J* = 8.4 Hz, 2H), 7.22 (d, *J* = 8.5 Hz, 2H), 5.90 (s, 2H), 4.18 (s, 2H). HRMS-ESI-TOF *m/z* calculated for C<sub>15</sub>H<sub>12</sub>Cl<sub>2</sub>N<sub>4</sub>O<sub>2</sub>S<sub>2</sub><sup>+</sup> [*M*<sup>+</sup>]: 414.9857, found: 414.9853.

This compound is also commercially available from Ambinter (AMB24475).

**Compound 34: 1-((4-bromophenyl)sulfonyl)-3-((4-chlorobenzyl)thio)-5-amino-1*H*-1,2,4-triazole**

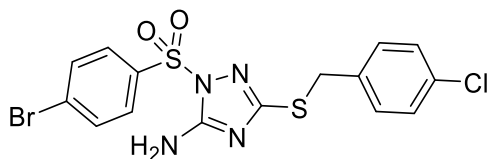

Compound **34** was prepared from 4-bromophenylsulfonyl chloride (1.2 equiv, 0.25 mmol, 63.8 mg) using the general procedure. Flash chromatography (SiO<sub>2</sub>, 50% EtOAc/hexanes) yielded the desired product as a white solid (41 mg, 43%). <sup>1</sup>H NMR (CDCl<sub>3</sub>, 400 MHz) δ 7.71 (d, *J* = 8.6 Hz, 2H), 7.68 (d, *J* = 8.6 Hz, 2H), 7.26 (d, *J* = 8.6 Hz, 2H), 7.22 (d, *J* = 8.6 Hz, 2H), 5.82 (s, 2H), 4.18 (s, 2H). HRMS-ESI-TOF *m/z* calculated for C<sub>15</sub>H<sub>13</sub>BrClN<sub>4</sub>O<sub>2</sub>S<sub>2</sub><sup>+</sup> [*M* + H<sup>+</sup>]: 458.9346, found: 458.9351.

The structure of **34** was confirmed by X-ray structure determination (CCDC 1825319; **Supplementary Table 6**).

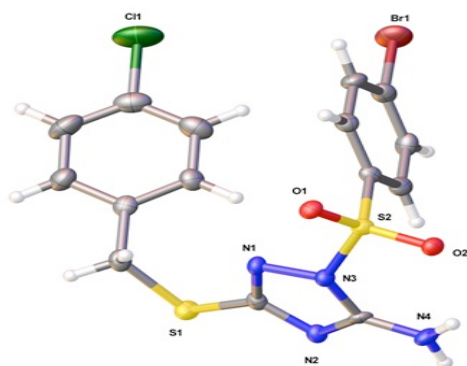

**Compound 35: 3-((4-chlorobenzyl)thio)-1-(4-methylphenyl)sulfonyl-5-amino-1*H*-1,2,4-triazole**

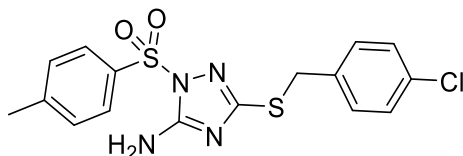

Compound **35** was prepared from 4-methylphenylsulfonyl chloride (1.2 equiv, 0.25 mmol, 48 mg) using the general procedure. Flash chromatography (SiO<sub>2</sub>, 30% EtOAc/hexanes) yielded the desired product as a white solid (64 mg, 77%). <sup>1</sup>H NMR (CDCl<sub>3</sub>, 500 MHz) δ 7.79 (d, *J* = 8.4 Hz, 2H), 7.32 (d, *J* = 8.4 Hz, 2H), 7.24 (d, *J* = 8.4 Hz, 2H), 7.17 (d, *J* = 8.4 Hz, 2H), 5.81 (s, 2H), 4.17 (s, 2H), 2.47 (s, 3H). HRMS-ESI-TOF *m/z* calculated for C<sub>16</sub>H<sub>16</sub>ClN<sub>4</sub>O<sub>2</sub>S<sub>2</sub><sup>+</sup> [*M* + H<sup>+</sup>]: 395.0398, found: 395.0398.

**Compound 36: 3-((4-chlorobenzyl)thio)-1-((4-ethylphenyl)sulfonyl)-5-amino-1*H*-1,2,4-triazole**

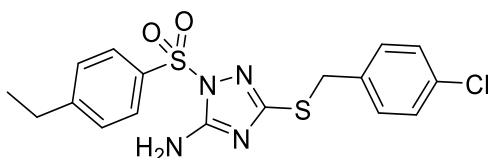

Compound **36** was prepared from 4-ethylphenylsulfonyl chloride (1.2 equiv, 0.25 mmol, 24  $\mu$ L) using the general procedure. Flash chromatography (SiO<sub>2</sub>, 50% EtOAc/hexanes) yielded the desired product as a white solid (51 mg, 84%). <sup>1</sup>H NMR (CDCl<sub>3</sub>, 500 MHz)  $\delta$  7.82 (d, *J* = 8.5 Hz, 2H), 7.35 (d, *J* = 8.4 Hz, 2H), 7.26 (d, *J* = 8.5 Hz, 2H), 7.18 (d, *J* = 8.4 Hz, 2H), 5.80 (s, 2H), 4.18 (s, 2H), 2.76 (q, *J* = 7.6 Hz, 2H), 1.29 (t, *J* = 7.6 Hz, 3H). HRMS-ESI-TOF *m/z* calculated for C<sub>17</sub>H<sub>18</sub>ClN<sub>4</sub>O<sub>2</sub>S<sub>2</sub><sup>+</sup> [*M* + H<sup>+</sup>]: 409.0554, found: 409.0558.

**Compound 37: 3-((4-chlorobenzyl)thio)-1-((4-methoxyphenyl)sulfonyl)-5-amino-1*H*-1,2,4-triazole**

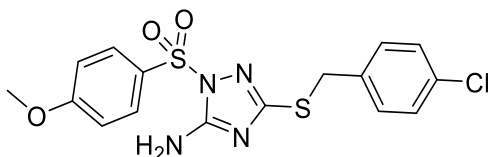

Compound **37** was prepared from 4-methoxyphenylsulfonyl chloride (1.2 equiv, 0.25 mmol, 52 mg) using the general procedure. Flash chromatography (SiO<sub>2</sub>, 30% EtOAc/hexanes) yielded the desired product as a white solid (72 mg, 70%). <sup>1</sup>H NMR (CDCl<sub>3</sub>, 500 MHz)  $\delta$  7.84 (d, *J* = 9.1 Hz, 2H), 7.25 (d, *J* = 8.4 Hz, 2H), 7.19 (d, *J* = 8.4 Hz, 2H), 6.97 (d, *J* = 9.0 Hz, 2H), 5.82 (s, 2H), 4.17 (s, 2H), 3.90 (s, 3H). HRMS-ESI-TOF *m/z* calculated for C<sub>16</sub>H<sub>16</sub>ClN<sub>4</sub>O<sub>3</sub>S<sub>2</sub><sup>+</sup> [*M* + H<sup>+</sup>]: 412.0299, found: 412.0299.

The structure of **37** was confirmed by X-ray structure determination (CDCC 1825322; **Supplementary Table 7**).

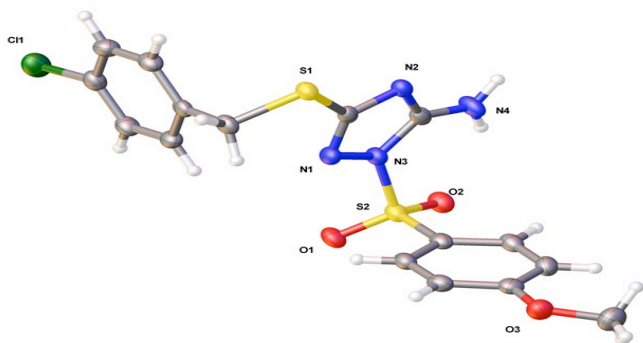

**Compound 38: 4-((5-amino-3-((4-chlorobenzyl)thio)-1*H*-1,2,4-triazol-1-yl)sulfonyl)benzonitrile**

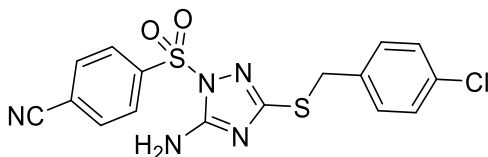

Compound **38** was prepared from 4-cyanophenylsulfonyl chloride (1.2 equiv, 0.25 mmol, 50.2 mg) using the general procedure. Flash chromatography (SiO<sub>2</sub>, 50% EtOAc/hexanes) yielded the desired product as a white solid (68 mg, 80%). <sup>1</sup>H NMR (CDCl<sub>3</sub>, 500 MHz)  $\delta$  8.00 (d, *J* = 7.8 Hz, 2H), 7.82 (d, *J* = 7.8 Hz, 2H), 7.29 (d, *J* = 8.3 Hz, 2H), 7.24 (d, *J* = 8.3 Hz, 2H), 5.74 (s, 2H), 4.18 (s, 2H). LRMS-ESI *m/z* calculated for C<sub>16</sub>H<sub>13</sub>ClN<sub>5</sub>O<sub>2</sub>S<sub>2</sub><sup>+</sup> [*M* + H<sup>+</sup>]: 406.0, found: 406.0.

**Compound 39: 3-((4-chlorobenzyl)thio)-1-((4-nitrophenyl)sulfonyl)-5-amino-1*H*-1,2,4-triazole**

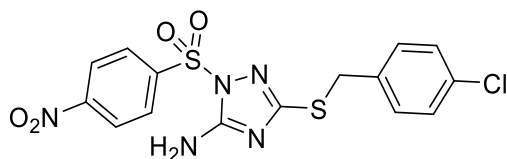

Compound **39** was prepared from 4-nitrophenylsulfonyl chloride (1.2 equiv, 0.25 mmol, 55 mg) using the general procedure. Flash chromatography (SiO<sub>2</sub>) yielded the desired product as a white solid. <sup>1</sup>H NMR (CDCl<sub>3</sub>, 500 MHz) δ 8.36 (d, *J* = 8.9 Hz, 2H), 8.09 (d, *J* = 8.9 Hz, 2H), 7.29 (d, *J* = 8.4 Hz, 2H), 7.24 (d, *J* = 8.4 Hz, 2H), 5.73 (s, 2H), 4.18 (s, 2H). HRMS-ESI-TOF *m/z* calculated for C<sub>15</sub>H<sub>13</sub>ClN<sub>5</sub>O<sub>4</sub>S<sub>2</sub><sup>+</sup> [*M* + H<sup>+</sup>]: 426.0092, found: 426.0092.

**Compound 40: 1-((1,1'-biphenyl)-4-ylsulfonyl)-3-((4-chlorobenzyl)thio)-5-amino-1H-1,2,4-triazole**

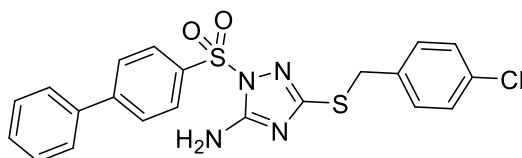

Compound **40** was prepared from (1, 1'-biphenyl)-4-sulfonyl chloride (1.2 equiv, 0.25 mmol, 63.6 mg) using the general procedure. Flash chromatography (SiO<sub>2</sub>) yielded the desired product as a white solid (80 mg, 83%). <sup>1</sup>H NMR (CDCl<sub>3</sub>, 400 MHz) δ 7.97 (d, *J* = 8.5 Hz, 2H), 7.73 (d, *J* = 8.5 Hz, 2H), 7.61 (d, *J* = 7.5 Hz, 2H), 7.55–7.42 (m, 4H), 7.29 (d, *J* = 4.5 Hz, 1H), 7.19 (d, *J* = 8.5 Hz, 2H), 5.80 (s, 2H), 4.19 (s, 2H). HRMS-ESI-TOF *m/z* calculated for C<sub>21</sub>H<sub>18</sub>ClN<sub>4</sub>O<sub>2</sub>S<sub>2</sub><sup>+</sup> [*M* + H<sup>+</sup>]: 457.0554, found: 457.0562.

**Compound 7: 3-((4-chlorobenzyl)thio)-1-((3-chlorophenyl)sulfonyl)-5-amino-1H-1,2,4-triazole**

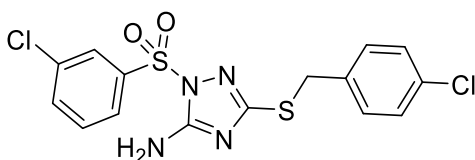

Compound **7** was prepared from 3-chlorophenylsulfonyl chloride (1.2 equiv, 0.25 mmol, 35 μL) using the general procedure. Flash chromatography (SiO<sub>2</sub>, 30% EtOAc/hexanes) yielded the desired product as a white solid. <sup>1</sup>H NMR (CD<sub>2</sub>Cl<sub>2</sub>, 400 MHz): δ 7.16 (s, 1H), 7.82 (d, *J* = 7.8 Hz, 1H), 7.72 (d, *J* = 7.8 Hz, 1H), 7.54 (t, *J* = 7.8 Hz, 1H), 7.28 (d, *J* = 8.5 Hz, 2H), 7.23 (d, *J* = 8.5 Hz, 2H), 6.02 (s, 2H), 4.20 (s, 2H). HRMS-ESI-TOF *m/z* calculated for C<sub>15</sub>H<sub>13</sub>Cl<sub>2</sub>N<sub>4</sub>O<sub>2</sub>S<sub>2</sub><sup>+</sup> [*M* + H<sup>+</sup>]: 414.9851, found: 414.9855.

**Compound 41: 3-((4-chlorobenzyl)thio)-1-((3-methoxyphenyl)sulfonyl)-5-amino-1H-1,2,4-triazole**

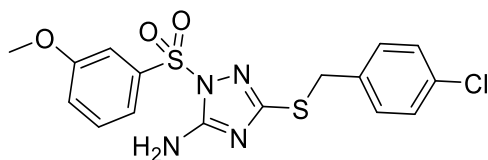

Compound **41** was prepared from 3-methoxyphenylsulfonyl chloride (1.2 equiv, 0.25 mmol, 35 μL) using the general procedure. Flash chromatography (SiO<sub>2</sub>, 30% EtOAc/hexanes) yielded the desired product as a white solid. <sup>1</sup>H NMR (CDCl<sub>3</sub>, 500 MHz): δ 7.51–7.42 (m, 3H), 7.25–7.15 (m,



5H), 5.84 (s, 2H), 4.18 (s, 2H), 3.86 (s, 3H). HRMS-ESI-TOF  $m/z$  calculated for  $C_{16}H_{16}ClN_4O_3S_2^+$  [ $M + H^+$ ]: 411.0347, found: 411.0354.

**Compound 42: 3-((4-chlorobenzyl)thio)-1-((3-nitrophenyl)sulfonyl)-5-amino-1H-1,2,4-triazole**

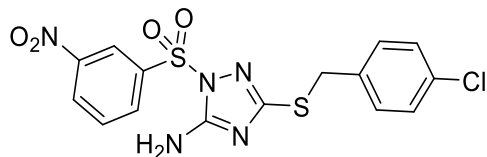

Compound **42** was prepared from 3-nitrophenylsulfonyl chloride (1.2 equiv, 0.25 mmol, 55 mg) using the general procedure. Flash chromatography ( $SiO_2$ , 50% EtOAc/hexanes) yielded the desired product as a white solid (76 mg, 86%).  $^1H$  NMR ( $DMSO-d_6$ , 500 MHz)  $\delta$  8.67–8.62 (m, 2H), 8.33 (ddd,  $J = 7.9, 1.7, 1.0$  Hz, 1H), 7.98 (t,  $J = 8.1$  Hz, 1H), 7.67 (s, 2H), 7.31 (m, 4H), 4.21 (s, 2H). LRMS-ESI  $m/z$  calculated for  $C_{15}H_{13}ClN_5O_4S_2^+$  [ $M + H^+$ ]: 426.0, found: 426.0.

**Compound 8: methyl 3-((5-amino-3-((4-chlorobenzyl)thio)-1H-1,2,4-triazol-1-yl)sulfonyl)-benzoate**

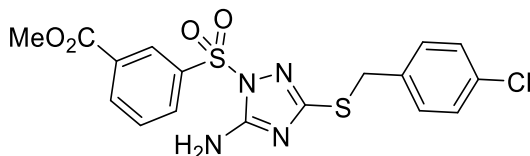

Compound **8** was prepared from methyl 3-chlorosulfonylbenzoate (1.2 equiv, 0.25 mmol, 58 mg) using the general procedure. Flash chromatography ( $SiO_2$ , 40% EtOAc/hexanes) yielded the desired product as a white solid.  $^1H$  NMR ( $CDCl_3$ , 500 MHz)  $\delta$  8.61 (t,  $J = 1.8$  Hz, 1H), 8.36 (dt,  $J = 7.8, 1.4$  Hz, 1H), 8.08 (m, 1H), 7.64 (t,  $J = 7.8$  Hz, 1H), 7.24 (d,  $J = 8.5$  Hz, 2H), 7.18 (d,  $J = 8.5$  Hz, 2H), 5.85 (s, 2H), 4.17 (s, 2H), 3.97 (s, 3H). LRMS-ESI  $m/z$  calculated for  $C_{17}H_{16}ClN_4O_4S_2^+$  [ $M + H^+$ ]: 439.0, found: 439.0.

**Compound 9: ethyl 3-((5-amino-3-((4-chlorobenzyl)thio)-1H-1,2,4-triazol-1-yl)sulfonyl)-benzoate**

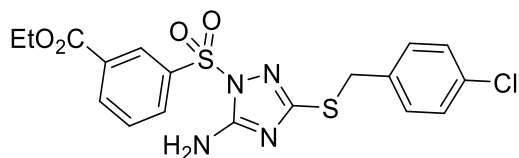

Compound **9** was prepared from ethyl 3-chlorosulfonylbenzoate (1.2 equiv, 0.25 mmol, 62 mg) using the general procedure. Flash chromatography ( $SiO_2$ , 35% EtOAc/hexanes) yielded the desired product as a white solid.  $^1H$  NMR ( $CDCl_3$ , 400 MHz)  $\delta$  8.62 (s, 1H), 8.37 (d,  $J = 8.4$  Hz, 1H), 8.07 (d,  $J = 8.0$  Hz, 1H), 7.63 (t,  $J = 7.9$  Hz, 1H), 7.21 (m, 4H), 5.82 (s, 2H), 4.43 (q,  $J = 7.2$  Hz, 2H), 4.19 (s, 2H), 1.41 (t,  $J = 7.2$  Hz, 3H). LRMS-ESI  $m/z$  calculated for  $C_{18}H_{18}ClN_4O_4S_2^+$  [ $M + H^+$ ]: 453.0, found: 453.0.

**Compound 43: methyl 3-((5-amino-3-((4-chlorobenzyl)thio)-1H-1,2,4-triazol-1-yl)sulfonyl)-2-methylbenzoate**

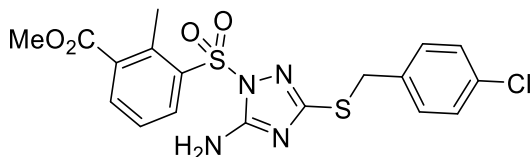

Compound **43** was prepared from methyl 3-(chlorosulfonyl)-2-methylbenzoate (1.2 equiv, 0.25 mmol, 62 mg) using the general procedure. Flash chromatography (SiO<sub>2</sub>, 30% EtOAc/hexanes) yielded the desired product as a white solid. <sup>1</sup>H NMR (CDCl<sub>3</sub>, 400 MHz) δ 8.24 (d, *J* = 8.2 Hz, 1H), 8.08 (d, *J* = 7.9 Hz, 1H), 7.48 (t, *J* = 8.1 Hz, 1H), 7.13 (m, 4H), 5.79 (s, 2H), 4.11 (s, 2H), 3.95 (s, 3H), 2.70 (s, 3H). LRMS-ESI *m/z* calculated for C<sub>18</sub>H<sub>18</sub>ClN<sub>4</sub>O<sub>4</sub>S<sub>2</sub><sup>+</sup> [M + H<sup>+</sup>]: 453.0, found: 453.0.

**Compound 44: 1-(3-((5-amino-3-((4-chlorobenzyl)thio)-1H-1,2,4-triazol-1-yl)sulfonyl)-phenyl)ethan-1-one**

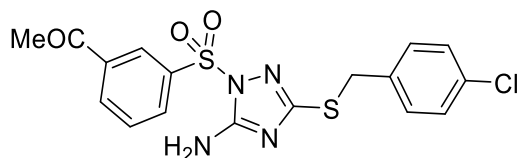

Compound **44** was prepared from 3-acetylphenylsulfonyl chloride (1.2 equiv, 0.25 mmol, 55 mg) using the general procedure. Flash chromatography (SiO<sub>2</sub>) yielded the desired product as a white solid. <sup>1</sup>H NMR (CDCl<sub>3</sub>, 400 MHz) δ 8.51 (t, *J* = 1.7 Hz, 1H), 8.27 (dt, *J* = 7.7, 1.6 Hz, 1H), 8.08 (d, *J* = 8.1 Hz, 1H), 7.67 (t, *J* = 7.9 Hz, 1H), 7.25 (d, *J* = 8.5 Hz, 2H), 7.18 (d, *J* = 8.5 Hz, 2H), 5.96 (s, 2H), 4.19 (s, 2H), 2.66 (s, 3H). LRMS-ESI *m/z* calculated for C<sub>17</sub>H<sub>16</sub>ClN<sub>4</sub>O<sub>3</sub>S<sub>2</sub><sup>+</sup> [M + H<sup>+</sup>]: 423.0, found: 423.0.

**Compound 45: 3-((5-amino-3-((4-chlorobenzyl)thio)-1H-1,2,4-triazol-1-yl)sulfonyl)-benzamide**

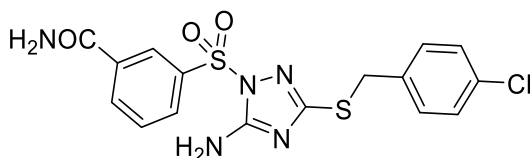

Compound **45** was prepared from 3-carbamoylbenzenesulfonyl chloride (1.2 equiv, 0.25 mmol, 55 mg) using the general procedure. Flash chromatography (SiO<sub>2</sub>, 50% EtOAc/hexanes) yielded the desired product as a white solid. <sup>1</sup>H NMR (DMSO-*d*<sub>6</sub>, 500 MHz) δ 8.47 (s, 1H), 8.30 (d, *J* = 8.2 Hz, 2H), 8.06 (d, *J* = 8.7 Hz, 1H), 7.76 (m, 2H), 7.55 (s, 2H), 7.29 (m, 4H), 4.19 (s, 2H). LRMS-ESI *m/z* calculated for C<sub>16</sub>H<sub>15</sub>ClN<sub>5</sub>O<sub>3</sub>S<sub>2</sub><sup>+</sup> [M + H<sup>+</sup>]: 424.0, found: 424.0.

**Compound 46: N-(3-((5-amino-3-((4-chlorobenzyl)thio)-1H-1,2,4-triazol-1-yl)sulfonyl)-phenyl)acetamide**

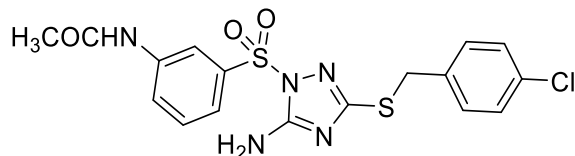

Compound **46** was prepared from 3-acetamidophenylsulfonyl chloride (1.2 equiv, 0.25 mmol, 58 mg) using the general procedure. Flash chromatography (SiO<sub>2</sub>, 60% EtOAc/hexanes) yielded the desired product as a white solid. <sup>1</sup>H NMR (CDCl<sub>3</sub>, 500 MHz) δ 8.13 (s, 1H), 7.87 (d, *J* = 7.4 Hz, 1H), 7.65 (d, *J* = 7.9 Hz, 1H), 7.48 (m, 2H), 7.24 (d, *J* = 8.4 Hz, 2H), 7.18 (d, *J* = 8.4 Hz, 2H), 5.71 (s, 2H), 4.18 (s, 2H), 2.22 (s, 3H). LRMS-ESI *m/z* calculated for C<sub>17</sub>H<sub>17</sub>ClN<sub>5</sub>O<sub>3</sub>S<sub>2</sub><sup>+</sup> [M + H<sup>+</sup>]: 438.0, found: 438.0.

**Compound 10: 5-amino-1-((3-(benzoylamino)phenylsulfonyl)-3-((4-chlorobenzyl)thio)-1H-1,2,4-triazole**

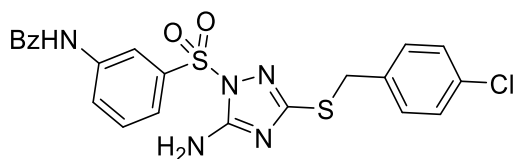

A stirred solution 1-((3-aminophenyl)sulfonyl)-3-((4-chlorobenzyl)thio)-5-amino-1*H*-1,2,4-triazole in dichloromethane was treated with pyridine at 0°C. Benzoyl chloride was added and the mixture stirred at 0°C for 30 min and then overnight at room temperature. The solvent was evaporated and the crude mixture purified by flash chromatography (SiO<sub>2</sub>, 25% EtOAc/hexanes) to yield the desired product as a white solid. <sup>1</sup>H NMR (CDCl<sub>3</sub>, 400 MHz) δ 8.33 (s, 1H), 8.47 (d, *J* = 8.2 Hz, 1H), 7.96 (s, 1H), 7.87 (d, *J* = 7.7 Hz, 2H), 7.69 (m, 1H), 7.62–7.50 (m, 4H), 7.25 (d, *J* = 8.2 Hz, 2H), 7.17 (d, *J* = 8.2 Hz, 2H), 5.81 (s, 2H), 4.21 (s, 2H). LRMS-ESI *m/z* calculated for C<sub>22</sub>H<sub>19</sub>ClN<sub>5</sub>O<sub>3</sub>S<sub>2</sub><sup>+</sup> [M + H<sup>+</sup>]: 500.0, found: 500.0.

**Compound 47: 1-([1,1'-biphenyl]-3-ylsulfonyl)-3-((4-chlorobenzyl)thio)-5-amino-1*H*-1,2,4-triazole**

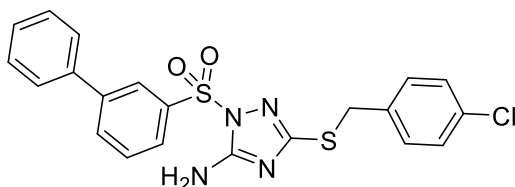

Compound **47** was prepared from 3-phenylbenzenesulfonyl chloride (1.2 equiv, 0.25 mmol, 63 mg) using the general procedure. Flash chromatography (SiO<sub>2</sub>, 30% EtOAc/hexanes) yielded the desired product as a white solid. <sup>1</sup>H NMR (CDCl<sub>3</sub>, 400 MHz) δ 8.17 (t, *J* = 2.0 Hz, 1H), 7.90 (m, 2H), 7.61 (m, 3H), 7.46 (m, 3H), 7.21 (d, *J* = 8.4 Hz, 2H), 7.12 (d, *J* = 8.4 Hz, 2H), 5.93 (s, 2H), 4.18 (s, 2H). LRMS-ESI *m/z* calculated for C<sub>21</sub>H<sub>18</sub>ClN<sub>4</sub>O<sub>2</sub>S<sub>2</sub><sup>+</sup> [M + H<sup>+</sup>]: 457.0, found: 457.0.

**Compound 48: 3-((4-chlorobenzyl)thio)-1-((2-fluorophenyl)sulfonyl)-5-amino-1*H*-1,2,4-triazole**

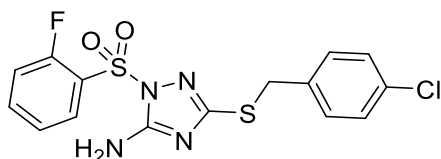

Compound **48** was prepared from 2-fluorophenylsulfonyl chloride (1.2 equiv, 0.25 mmol, 33 μL) using the general procedure. Flash chromatography (SiO<sub>2</sub>, 50% EtOAc/hexanes) yielded the desired product as a white solid (47 mg, 60%). <sup>1</sup>H NMR (CDCl<sub>3</sub>, 400 MHz) δ 8.06 (m, 1H), 7.74 (m, 1H), 7.39 (m, 1H), 7.22 (m, 1H), 7.17 (d, *J* = 8.6 Hz, 2H), 7.10 (d, *J* = 8.6 Hz, 2H), 5.86 (s, 2H), 4.12 (s, 2H). LRMS-ESI *m/z* calculated for C<sub>15</sub>H<sub>13</sub>ClFN<sub>4</sub>O<sub>2</sub>S<sub>2</sub><sup>+</sup> [M + H<sup>+</sup>]: 399.0, found: 399.0.

**Compound 49: 3-((4-chlorobenzyl)thio)-1-((2-nitrophenyl)sulfonyl)-5-amino-1*H*-1,2,4-triazole**

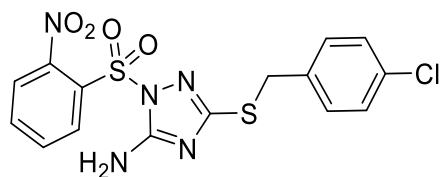

Compound **49** was prepared from 2-nitrophenylsulfonyl chloride (1.2 equiv, 0.25 mmol, 35 μL) using the general procedure. Flash chromatography (SiO<sub>2</sub>, 50% EtOAc/hexanes) yielded the

desired product as a white solid (83 mg, 78%).  $^1\text{H NMR}$  ( $\text{CDCl}_3$ , 400 MHz)  $\delta$  8.27 (dd,  $J = 8.0, 1.3$  Hz, 1H), 7.94–7.76 (m, 3H), 7.22 (d,  $J = 8.7$  Hz, 2H), 7.14 (d,  $J = 8.7$  Hz, 2H), 5.76 (s, 2H), 4.15 (s, 2H). LRMS-ESI  $m/z$  calculated for  $\text{C}_{15}\text{H}_{13}\text{ClN}_5\text{O}_4\text{S}_2^+$  [ $\text{M} + \text{H}^+$ ]: 426.0, found: 426.0.

**Compound 50: 3-((4-chlorobenzyl)thio)-1-(naphth-1-ylsulfonyl)-5-amino-1H-1,2,4-triazole**

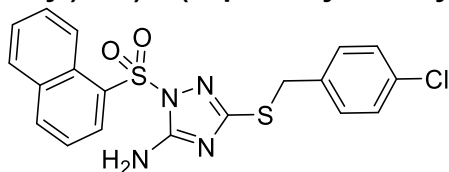

Compound **50** was prepared from naphthalene-1-sulfonyl chloride (1.2 equiv, 0.25 mmol, 35  $\mu\text{L}$ ) using the general procedure. Flash chromatography ( $\text{SiO}_2$ , 40% EtOAc/hexanes) yielded the desired product as a white solid.  $^1\text{H NMR}$  ( $\text{CDCl}_3$ , 400 MHz)  $\delta$  8.68 (d,  $J = 7.9$  Hz, 1H), 8.42 (dd,  $J = 7.5, 1.0$  Hz, 1H), 8.23 (d,  $J = 8.1$  Hz, 1H), 8.00 (m, 1H), 7.65 (m, 3H), 7.01 (m, 4H), 5.83 (s, 2H), 4.06 (s, 2H). HRMS-ESI-TOF  $m/z$  calculated for  $\text{C}_{19}\text{H}_{16}\text{ClN}_4\text{O}_2\text{S}_2^+$  [ $\text{M} + \text{H}^+$ ]: 431.0398, found: 431.0403.

**Compound 51: 3-((4-chlorobenzyl)thio)-1-(naphth-2-ylsulfonyl)-5-amino-1H-1,2,4-triazole**

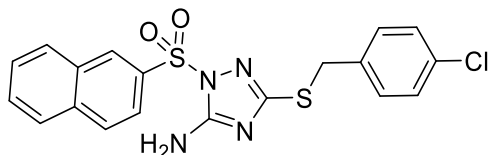

Compound **51** was prepared from naphthalene-2-sulfonyl chloride (1.2 equiv, 0.25 mmol, 35  $\mu\text{L}$ ) using the general procedure. Flash chromatography ( $\text{SiO}_2$ , 40% EtOAc/hexanes) yielded the desired product as a white solid (53 mg, 59%).  $^1\text{H NMR}$  ( $\text{CDCl}_3$ , 400 MHz)  $\delta$  8.58 (s, 1H), 7.99 (m, 3H), 7.81 (dd,  $J = 8.7, 1.7$  Hz, 1H), 7.71 (m, 2H), 7.16 (d,  $J = 8.4$  Hz, 2H), 6.99 (d,  $J = 8.4$  Hz, 2H), 5.83 (s, 2H), 4.15 (s, 2H). HRMS-ESI-TOF  $m/z$  calculated for  $\text{C}_{19}\text{H}_{16}\text{ClN}_4\text{O}_2\text{S}_2^+$  [ $\text{M} + \text{H}^+$ ]: 431.0398, found: 431.0400.

**Compound 52: 3-((4-chlorobenzyl)thio)-1-((2,3-dihydro-1H-inden-5-yl)sulfonyl)-5-amino-1H-1,2,4-triazole**

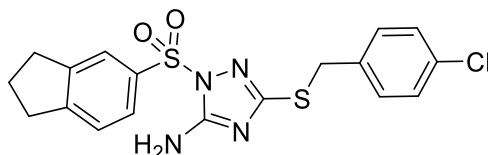

Compound **52** was prepared from indane-5-sulfonyl chloride (1.2 equiv, 0.25 mmol, 54 mg) using the general procedure. Flash chromatography ( $\text{SiO}_2$ , 30% EtOAc/hexanes) yielded the desired product as a white solid.  $^1\text{H NMR}$  ( $\text{CDCl}_3$ , 500 MHz)  $\delta$  7.75 (s, 1H), 7.72 (d,  $J = 8.1$  Hz, 1H), 7.36 (d,  $J = 8.0$  Hz, 1H), 7.24 (d,  $J = 8.3$  Hz, 2H), 7.16 (d,  $J = 8.3$  Hz, 2H), 5.84 (s, 2H), 4.18 (s, 2H), 2.99 (dt,  $J = 16.6, 7.5$  Hz, 4H), 2.17 (p,  $J = 7.6$  Hz, 2H). LRMS-ESI  $m/z$  calculated for  $\text{C}_{18}\text{H}_{18}\text{ClN}_4\text{O}_2\text{S}_2^+$  [ $\text{M} + \text{H}^+$ ]: 421.1, found: 421.0.

**Compound 53: 3-((4-chlorobenzyl)thio)-1-((5,6,7,8-tetrahydronaphthalen-1-yl)sulfonyl)-5-amino-1H-1,2,4-triazole**

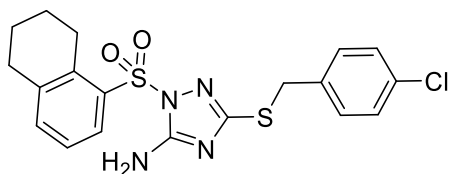

Compound **53** was prepared from 5,6,7,8-tetrahydronaphthalene-1-sulfonyl chloride (1.2 equiv, 0.25 mmol, 34.6 mg) using the general procedure. Flash chromatography (SiO<sub>2</sub>, 30% EtOAc/hexanes) yielded the desired product as a white solid. <sup>1</sup>H NMR (CDCl<sub>3</sub>, 500 MHz) δ 7.62 (m, 2H), 7.22 (m, 3H), 7.16 (d, *J* = 8.4 Hz, 2H), 5.86 (s, 2H), 4.18 (s, 2H), 2.86 (m, 2H), 2.80 (m, 2H), 1.83 (m, 4H). LRMS-ESI *m/z* calculated for C<sub>19</sub>H<sub>20</sub>ClN<sub>4</sub>O<sub>2</sub>S<sub>2</sub><sup>+</sup> [M + H<sup>+</sup>]: 435.1, found: 435.0.

**Compound 54: 3-((4-chlorobenzyl)thio)-1-(furan-3-ylsulfonyl)-5-amino-1H-1,2,4-triazole**

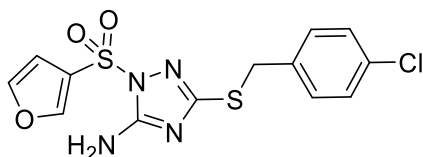

Compound **54** was prepared from furan-3-sulfonyl chloride (1.2 equiv, 0.25 mmol, 27 μL) using the general procedure. Flash chromatography (SiO<sub>2</sub>, 40% EtOAc/hexanes) yielded the desired product as a white solid (36 mg, 47%). <sup>1</sup>H NMR (CDCl<sub>3</sub>, 400 MHz) δ 8.08 (s, 1H), 7.50 (t, *J* = 1.6 Hz, 1H), 7.30 (d, *J* = 8.5 Hz, 2H), 7.23 (d, *J* = 8.5 Hz, 2H), 6.59 (s, 1H), 5.79 (s, 2H), 4.22 (s, 2H). LRMS-ESI *m/z* calculated for C<sub>13</sub>H<sub>12</sub>ClN<sub>4</sub>O<sub>3</sub>S<sub>2</sub><sup>+</sup> [M + H<sup>+</sup>]: 370.0, found: 370.0.

**Compound 55: 3-((4-chlorobenzyl)thio)-1-(thiophen-3-ylsulfonyl)-5-amino-1H-1,2,4-triazole**

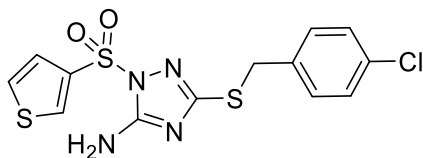

Compound **55** was prepared from thiophene-3-sulfonyl chloride (1.2 equiv, 0.25 mmol, 30 μL) using the general procedure. Flash chromatography (SiO<sub>2</sub>, 35% EtOAc/hexanes) yielded the desired product as a white solid. <sup>1</sup>H NMR (CDCl<sub>3</sub>, 400 MHz) δ 8.16 (m, 1H), 7.44 (dd, *J* = 5.2, 3.1 Hz, 1H), 7.32 (d, *J* = 5.2 Hz, 1H), 7.29 (d, *J* = 8.3 Hz, 2H), 7.23 (d, *J* = 8.3 Hz, 2H), 5.95 (s, 2H), 4.22 (s, 2H). HRMS-ESI-TOF *m/z* calculated for C<sub>13</sub>H<sub>12</sub>ClN<sub>4</sub>O<sub>2</sub>S<sub>3</sub><sup>+</sup> [M + H<sup>+</sup>]: 386.9805, found: 386.9805.

**Compound 56: 3-((4-chlorobenzyl)thio)-1-(thiophen-2-ylsulfonyl)-5-amino-1H-1,2,4-triazole**

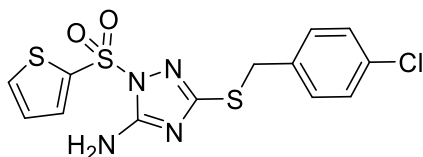

Compound **56** was purchased from Ambinter (AMB2745086).

**Compound 57: 3-((4-chlorobenzyl)thio)-1-((5-phenylthiophen-2-yl)sulfonyl)-5-amino-1H-1,2,4-triazole**

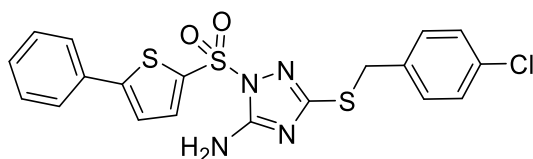

Compound **57** was prepared from 5-phenyl-2-thiophenesulfonyl chloride (1.2 equiv, 0.25 mmol, 64.5 mg) using the general procedure. Flash chromatography (SiO<sub>2</sub>, 50% EtOAc/hexanes) yielded the desired product as a white solid (52 mg, 45%). <sup>1</sup>H NMR (CDCl<sub>3</sub>, 500 MHz) δ 7.71 (d, *J* = 4.0 Hz, 1H), 7.59 (m, 2H), 7.45 (m, 3H), 7.30 (d, *J* = 8.3 Hz, 2H), 7.28 (d, *J* = 4.0 Hz, 1H), 7.19 (d, *J* = 8.3 Hz, 2H), 5.82 (s, 2H), 4.22 (s, 2H). HRMS-ESI-TOF *m/z* calculated for C<sub>19</sub>H<sub>16</sub>ClN<sub>4</sub>O<sub>2</sub>S<sub>3</sub><sup>+</sup> [*M* + H<sup>+</sup>]: 463.0118, found: 463.0121.

**Compound 58: 3-((4-chlorobenzyl)thio)-1-((5-(pyridin-2-yl)thiophen-2-yl)sulfonyl)-5-amino-1H-1,2,4-triazole**

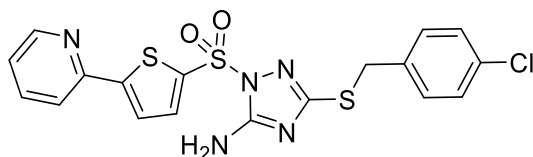

Compound **58** was purchased from Ambinter (AMB2745089).

**Compound 59: 3-((4-chlorobenzyl)thio)-1-((6-methoxypyridin-3-yl)sulfonyl)-5-amino-1H-1,2,4-triazole**

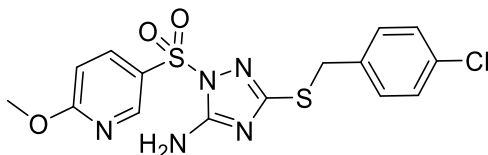

Compound **59** was prepared from 6-methoxypyridine-3-sulfonyl chloride (1.2 equiv, 0.25 mmol, 52 mg) using the general procedure. Flash chromatography (SiO<sub>2</sub>, 50% EtOAc/hexanes) yielded the desired product as a white solid (52 mg, 60%). <sup>1</sup>H NMR (CDCl<sub>3</sub>, 500 MHz) δ 8.75 (d, *J* = 2.4 Hz, 1H), 7.93 (dd, *J* = 8.9, 2.6 Hz, 1H), 7.27 (d, *J* = 8.6 Hz, 2H), 7.22 (d, *J* = 8.6 Hz, 2H), 6.81 (d, *J* = 8.9 Hz, 1H), 5.80 (s, 2H), 4.18 (s, 2H), 4.05 (s, 3H). LRMS-ESI *m/z* calculated for C<sub>15</sub>H<sub>15</sub>ClN<sub>5</sub>O<sub>3</sub>S<sub>2</sub><sup>+</sup> [*M* + H<sup>+</sup>]: 412.0, found: 412.1.

**Compound 60: 3-((4-chlorobenzyl)thio)-1-((6-(trifluoromethyl)pyridin-3-yl)sulfonyl)-5-amino-1H-1,2,4-triazole**

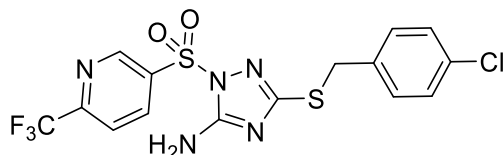

Compound **60** was prepared from 6-trifluoromethylpyridine-3-sulfonyl chloride (1.2 equiv, 0.25 mmol, 61 mg) using the general procedure. Flash chromatography (SiO<sub>2</sub>) yielded the desired product as a white solid (61 mg, 65%). <sup>1</sup>H NMR (DMSO-*d*<sub>6</sub>, 500 MHz) δ 9.31 (d, *J* = 2.1 Hz, 1H), 8.61 (dd, *J* = 8.3, 2.1 Hz, 1H), 8.23 (d, *J* = 8.3 Hz, 1H), 7.67 (s, 2H), 7.34 (d, *J* = 8.6 Hz, 2H), 7.29 (d, *J* = 8.6 Hz, 2H), 4.22 (s, 2H). LRMS-ESI *m/z* calculated for C<sub>15</sub>H<sub>12</sub>ClF<sub>3</sub>N<sub>5</sub>O<sub>2</sub>S<sub>2</sub><sup>+</sup> [*M* + H<sup>+</sup>]: 450.0, found: 450.0.

**Compound 61: 1-((6-bromopyridin-2-yl)sulfonyl)-3-((4-chlorobenzyl)thio)-5-amino-1H-1,2,4-triazole**

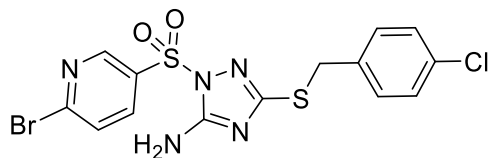

Compound **61** was prepared from 6-bromopyridine-3-sulfonyl chloride (1.2 equiv, 0.25 mmol, 63 mg) using the general procedure. Flash chromatography (SiO<sub>2</sub>, 45% EtOAc/hexanes) yielded the desired product as a white solid (45 mg, 46%). <sup>1</sup>H NMR (DMSO-*d*<sub>6</sub>, 500 MHz) δ 8.91 (d, *J* = 2.6 Hz, 1H), 7.93 (dd, *J* = 8.4, 2.6 Hz, 1H), 7.65 (d, *J* = 8.4 Hz, 1H), 7.27 (m, 4H), 5.76 (s, 2H), 4.18 (s, 2H). HRMS-ESI-TOF *m/z* calculated for C<sub>14</sub>H<sub>12</sub>BrClN<sub>5</sub>O<sub>2</sub>S<sub>2</sub><sup>+</sup> [*M* + H<sup>+</sup>]: 459.9299, found: 459.9298.

**Compound 62: 3-((4-chlorobenzyl)thio)-1-((6-phenylpyridin-3-yl)sulfonyl)-5-amino-1H-1,2,4-triazole**

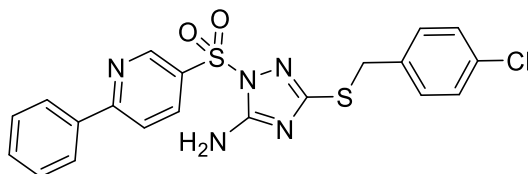

Compound **62** was prepared from 6-phenylpyridine-3-sulfonyl chloride (1.2 equiv, 0.25 mmol, 63 mg) using the general procedure. Flash chromatography (SiO<sub>2</sub>, 35% EtOAc/hexanes) yielded the desired product as a white solid (78 mg, 81%). <sup>1</sup>H NMR (CDCl<sub>3</sub>, 400 MHz) δ 9.19 (d, *J* = 2.4 Hz, 1H), 8.15 (dd, *J* = 8.5, 2.4 Hz, 1H), 8.10 (d, *J* = 3.5 Hz, 1H), 8.09 (d, *J* = 2.4 Hz, 1H), 7.87 (d, *J* = 8.5 Hz, 1H), 7.54 (m, 3H), 7.28 (d, *J* = 8.5 Hz, 2H), 7.21 (d, *J* = 8.5 Hz, 2H), 5.90 (s, 2H), 4.20 (s, 2H). HRMS-ESI-TOF *m/z* calculated for C<sub>20</sub>H<sub>17</sub>ClN<sub>5</sub>O<sub>2</sub>S<sub>2</sub><sup>+</sup> [*M* + H<sup>+</sup>]: 458.0507, found: 458.0511.

**Compound 63: 3-((4-chlorobenzyl)thio)-1-(quinolin-8-ylsulfonyl)-5-amino-1H-1,2,4-triazole**

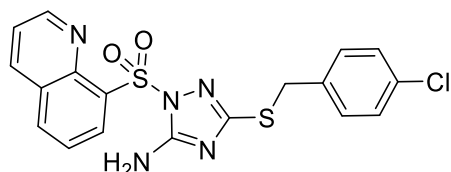

Compound **63** was prepared from quinoline-8-sulfonyl chloride (1.2 equiv, 0.25 mmol, 57 mg) using the general procedure. Flash chromatography (SiO<sub>2</sub>, 60% EtOAc/hexanes) yielded the desired product as a white solid. <sup>1</sup>H NMR (DMSO-*d*<sub>6</sub>, 500 MHz) δ 8.90 (dd, *J* = 4.3, 1.8 Hz, 1H), 8.60 (dd, *J* = 8.4, 1.8 Hz, 1H), 8.57 (dd, *J* = 7.5, 1.5 Hz, 1H), 8.50 (dd, *J* = 8.3, 1.5 Hz, 1H), 7.89 (t, *J* = 7.8 Hz, 1H), 7.72 (dd, *J* = 8.4, 4.3 Hz, 1H), 7.39 (s, 2H), 7.02 (m, 4H), 4.03 (s, 2H). HRMS-ESI-TOF *m/z* calculated for C<sub>18</sub>H<sub>15</sub>ClN<sub>5</sub>O<sub>2</sub>S<sub>2</sub><sup>+</sup> [*M* + H<sup>+</sup>]: 431.0350, found: 431.0355.

**Compound 64: 3-((4-chlorobenzyl)thio)-1-((1-methyl-1H-indol-4-yl)sulfonyl)-5-amino-1H-1,2,4-triazole**

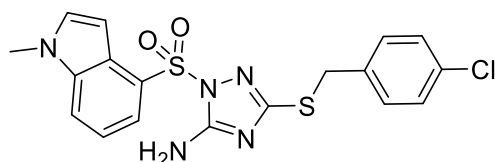

Compound **64** was prepared from 1-methyl-1*H*-indole-4-sulfonyl chloride (1.2 equiv, 0.25 mmol, 57 mg) using the general procedure. Flash chromatography (SiO<sub>2</sub>, 40% EtOAc/hexanes) yielded the desired product as a white solid (13 mg, 15%). <sup>1</sup>H NMR (CDCl<sub>3</sub>, 400 MHz) δ 7.88 (d, *J* = 7.7 Hz, 1H), 7.70 (d, *J* = 7.7 Hz, 1H), 7.33 (t, *J* = 7.6 Hz, 1H), 7.25 (m, 1H), 7.05 (m, 4H), 6.93 (d, *J* = 3.5 Hz, 1H), 6.01 (s, 2H), 4.10 (s, 2H), 3.90 (s, 3H). LRMS-ESI *m/z* calculated for C<sub>18</sub>H<sub>17</sub>ClN<sub>5</sub>O<sub>2</sub>S<sub>2</sub><sup>+</sup> [*M* + H<sup>+</sup>]: 434.1, found: 434.4.

**Compound 65: 1-((1*H*-benzo[*d*]imidazol-6-yl)sulfonyl)-3-((4-chlorobenzyl)thio)-5-amino-1*H*-1,2,4-triazole**

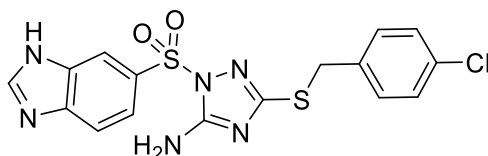

Compound **65** was prepared from 1*H*-benzimidazole-5-sulfonyl chloride (1.2 equiv, 0.25 mmol, 52 mg) using the general procedure. Flash chromatography (SiO<sub>2</sub>, 100% EtOAc) yielded the desired product as a white solid. <sup>1</sup>H NMR (DMSO-*d*<sub>6</sub>, 400 MHz) δ 8.58 (s, 1H), 8.31 (s, 1H), 7.83 (d, *J* = 8.9 Hz, 1H), 7.73 (d, *J* = 8.9 Hz, 1H), 7.49 (s, 2H), 7.26 (d, *J* = 7.9 Hz, 2H), 7.17 (d, *J* = 7.9 Hz, 2H), 4.18 (s, 2H). LRMS-ESI *m/z* calculated for C<sub>16</sub>H<sub>14</sub>ClN<sub>6</sub>O<sub>2</sub>S<sub>2</sub><sup>+</sup> [*M* + H<sup>+</sup>]: 421.0, found: 421.0.

**Compound 67 1-(benzo[*d*]thiazol-4-ylsulfonyl)-3-((4-chlorobenzyl)thio)-5-amino-1*H*-1,2,4-triazole**

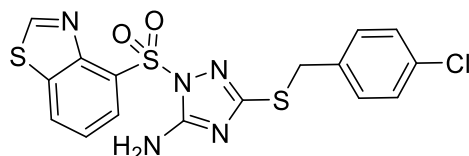

Compound **67** was prepared from 1,3-benzthiazole-4-sulfonyl chloride (1.2 equiv, 0.25 mmol, 49 mg) using the general procedure. The white residue was recrystallized in minimum volume of hexanes to yield the desired product as a white solid. <sup>1</sup>H NMR (CDCl<sub>3</sub>, 400 MHz) δ 9.11 (s, 1H), 8.35 (m, 2H), 7.68 (t, *J* = 8.1 Hz, 1H), 7.06 (d, *J* = 8.6 Hz, 2H), 7.00 (d, *J* = 8.6 Hz, 2H), 6.39 (s, 2H), 4.08 (s, 2H). LRMS-ESI *m/z* calculated for C<sub>16</sub>H<sub>13</sub>ClN<sub>5</sub>O<sub>2</sub>S<sub>3</sub><sup>+</sup> [*M* + H<sup>+</sup>]: 438.0, found: 438.0.

**Compound 11: 1-(benzo[*d*]thiazol-6-ylsulfonyl)-3-((4-chlorobenzyl)thio)-5-amino-1*H*-1,2,4-triazole**

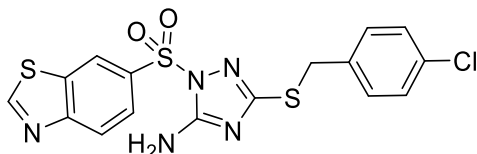

Compound **11** was prepared from 1,3-benzthiazole-6-sulfonyl chloride (1.2 equiv, 0.25 mmol, 58 mg) using the general procedure. Flash chromatography (SiO<sub>2</sub>) yielded the desired product as a white solid (73 mg, 79%). <sup>1</sup>H NMR (CDCl<sub>3</sub>, 400 MHz) δ 9.30 (s, 1H), 8.64 (d, *J* = 1.5 Hz, 1H), 8.28 (d, *J* = 8.6 Hz, 1H), 8.03 (dd, *J* = 8.6, 1.5 Hz, 1H), 7.22 (d, *J* = 8.3 Hz, 2H), 7.13 (d, *J* = 8.3 Hz, 2H), 5.86 (s, 2H), 4.17 (s, 2H). HRMS-ESI-TOF *m/z* calculated for C<sub>16</sub>H<sub>13</sub>ClN<sub>5</sub>O<sub>2</sub>S<sub>3</sub><sup>+</sup> [*M* + H<sup>+</sup>]: 437.9914, found: 437.9915.

**Compound 68: 1-(benzo[*c*][1,2,5]oxadiazol-4-ylsulfonyl)-3-((4-chlorobenzyl)thio)-5-amino-1*H*-1,2,4-triazole**



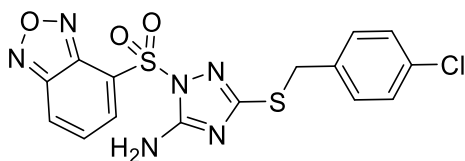

Compound **68** was purchased from Ambinter (AMB2745088).

**Compound 13: 3-((4-chlorobenzyl)thio)-1-((2-methylbenzo[d]oxazol-6-yl)sulfonyl)-5-amino-1H-1,2,4-triazole**

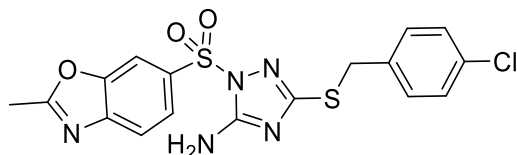

Compound **13** was prepared from 2-methyl-1,3-benzoxazole-6-sulfonyl chloride (1.2 equiv, 0.25 mmol, 58 mg) using the general procedure. Flash chromatography (SiO<sub>2</sub>, 30% EtOAc/hexanes) yielded the desired product as a white solid. <sup>1</sup>H NMR (CDCl<sub>3</sub>, 400 MHz): δ 8.09 (d, *J* = 1.8 Hz, 1H), 7.89 (dd, *J* = 8.4, 1.7 Hz, 1H), 7.77 (d, *J* = 8.4 Hz, 1H), 7.25 (d, *J* = 8.4 Hz, 2H), 7.16 (d, *J* = 8.4 Hz, 2H), 5.88 (s, 2H), 4.17 (s, 2H), 2.74 (s, 3H). LRMS-ESI *m/z* calculated for C<sub>17</sub>H<sub>15</sub>ClN<sub>5</sub>O<sub>3</sub>S<sub>2</sub><sup>+</sup> [*M* + H<sup>+</sup>]: 436.0, found: 436.0.

**Compound 14: 6-((5-amino-3-((4-chlorobenzyl)thio)-1H-1,2,4-triazol-1-yl)sulfonyl)benzo[d]thiazol-2(3H)-one**

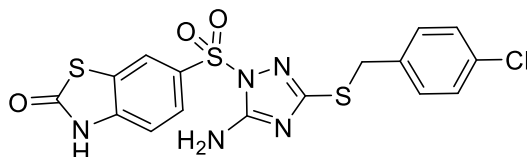

Compound **14** was prepared from 2-oxo-2,3-dihydrobenzothiazole-6-sulfonyl chloride (1.2 equiv, 0.25 mmol, 62 mg) using the general procedure. Flash chromatography (SiO<sub>2</sub>) yielded the desired product as a white solid. <sup>1</sup>H NMR (DMSO-*d*<sub>6</sub>, 400 MHz) δ 8.36 (s, 1H), 7.83 (d, *J* = 7.8 Hz, 1H), 7.46 (s, 2H), 7.35–7.22 (m, 6H), 4.18 (s, 2H). LRMS-ESI *m/z* calculated for C<sub>16</sub>H<sub>13</sub>ClN<sub>5</sub>O<sub>3</sub>S<sub>3</sub><sup>+</sup> [*M* + H<sup>+</sup>]: 454.0, found: 454.0.

**Compound 69: 5-((5-amino-3-((4-chlorobenzyl)thio)-1H-1,2,4-triazol-1-yl)sulfonyl)-1,3-dihydro-2H-benzo[d]imidazol-2-one**

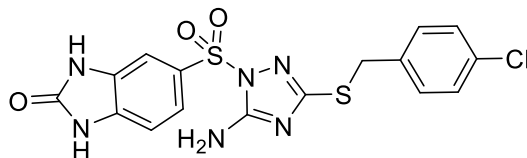

Compound **69** was prepared from 2-oxo-2,3-dihydro-1H-1,3-benzodiazole-5-sulfonyl chloride (1.2 equiv, 0.25 mmol, 58 mg) using the general procedure. Flash chromatography (SiO<sub>2</sub>) yielded the desired product as a white solid. <sup>1</sup>H NMR (DMSO-*d*<sub>6</sub>, 400 MHz) δ 11.41 (s, 1H), 11.18 (s, 1H), 7.58 (d, *J* = 7.6 Hz, 1H), 7.46 (s, 2H), 7.43 (s, 1H), 7.30 (d, *J* = 8.5 Hz, 2H), 7.24 (d, *J* = 8.5 Hz, 2H), 4.18 (s, 2H). LRMS-ESI *m/z* calculated for C<sub>16</sub>H<sub>14</sub>ClN<sub>6</sub>O<sub>3</sub>S<sub>2</sub><sup>+</sup> [*M* + H<sup>+</sup>]: 437.0, found: 437.0.

**Compound 70: 5-((5-amino-3-((4-chlorobenzyl)thio)-1H-1,2,4-triazol-1-yl)sulfonyl)-3-methylbenzo[d]oxazol-2(3H)-one**

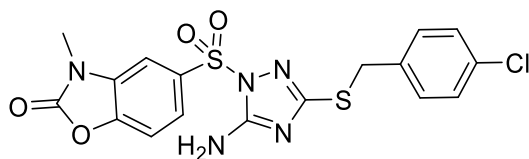

Compound **70** was prepared from 3-methyl-2-oxo-2,3-dihydrobenzoxazole-5-sulfonyl chloride (1.2 equiv, 0.25 mmol, 61 mg) using the general procedure. Flash chromatography (SiO<sub>2</sub>, 50% EtOAc/hexanes) yielded the desired product as a white solid. <sup>1</sup>H NMR (DMSO-*d*<sub>6</sub>, 400 MHz) δ 7.80 (d, *J* = 8.3 Hz, 1H), 7.75 (d, *J* = 1.6 Hz, 1H), 7.28 (d, *J* = 8.3 Hz, 2H), 7.21 (d, *J* = 8.3 Hz, 2H), 7.05 (d, *J* = 8.3 Hz, 1H), 6.00 (s, 2H), 4.19 (s, 2H), 3.48 (s, 3H). LRMS-ESI *m/z* calculated for C<sub>17</sub>H<sub>15</sub>ClN<sub>5</sub>O<sub>4</sub>S<sub>2</sub><sup>+</sup> [M + H<sup>+</sup>]: 452.0, found: 452.0.

### Characterization for representative inactive compounds

#### **Compound 15: 3-(4-chlorobenzyl)amino-1-((2,3-dihydrobenzofuran-5-yl)sulfonyl)-5-amino-1H-1,2,4-triazole**

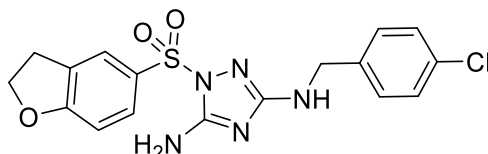

Compound **15** was prepared from 2,3-dihydrobenzofuran-5-sulfonyl chloride (1.2 equiv, 0.25 mmol, 59 mg) using the general procedure. Flash chromatography (SiO<sub>2</sub>, 60% EtOAc/hexanes) yielded the desired product as a white solid. <sup>1</sup>H NMR (CDCl<sub>3</sub>, 400 MHz) δ 7.68–7.64 (m, 2H), 7.33 (d, *J* = 8.4 Hz, 2H), 7.25 (d, *J* = 8.4 Hz, 2H), 6.82 (d, *J* = 8.3 Hz, 1H), 6.67 (t, *J* = 5.5 Hz, 1H), 4.70 (t, *J* = 8.7 Hz, 2H), 4.55 (d, *J* = 6.2 Hz, 2H), 4.12 (s, 2H), 3.24 (t, *J* = 8.7 Hz, 2H). LRMS-ESI *m/z* calculated for C<sub>17</sub>H<sub>17</sub>ClN<sub>5</sub>O<sub>3</sub>S<sup>+</sup> [M + H<sup>+</sup>]: 406.1, found: 406.0.

#### **Compound 16: 3-(4-chlorophenethyl)amino-1-((2,3-dihydrobenzofuran-5-yl)sulfonyl)-5-amino-1H-1,2,4-triazole**

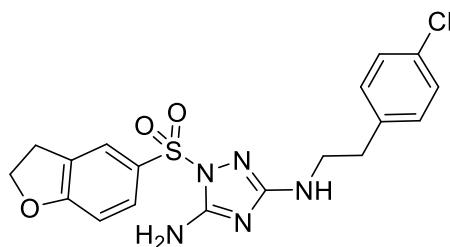

Compound **16** was prepared from 2,3-dihydrobenzofuran-5-sulfonyl chloride (1.2 equiv, 0.25 mmol, 58 mg) using the general procedure. Flash chromatography (SiO<sub>2</sub>, 40% EtOAc/hexanes) yielded the desired product as a white solid. <sup>1</sup>H NMR (CDCl<sub>3</sub>, 500 MHz) δ 7.80–7.75 (m, 2H), 7.22 (d, *J* = 8.1 Hz, 2H), 7.03 (d, *J* = 8.1 Hz, 2H), 6.85 (d, *J* = 8.3 Hz, 1H), 6.23 (t, *J* = 6.0 Hz, 1H), 5.89 (s, 2H), 4.69 (m, 2H), 3.40 (m, 2H), 3.24 (t, *J* = 8.8 Hz, 2H), 2.77 (t, *J* = 6.7 Hz, 2H). LRMS-ESI *m/z* calculated for C<sub>18</sub>H<sub>19</sub>ClN<sub>5</sub>O<sub>3</sub>S<sup>+</sup> [M + H<sup>+</sup>]: 420.1, found: 420.0.

#### **Compound 17: 1-((2-methylbenzo[*d*]thiazol-6-yl)sulfonyl)-3-(4-chlorobenzyl)amino-5-amino-1H-1,2,4-triazole**

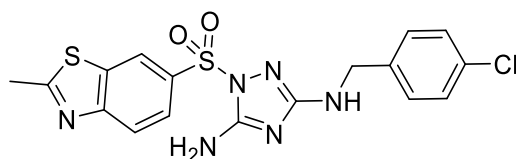

Compound **17** was prepared from 2-methyl-1,3-benzothiazole-6-sulfonyl chloride (1.2 equiv, 0.25 mmol, 65 mg) using the general procedure. Flash chromatography (SiO<sub>2</sub>, 50% EtOAc/hexanes) yielded the desired product as a white solid (61 mg, 64%). <sup>1</sup>H NMR (CDCl<sub>3</sub>, 500 MHz) δ 8.43 (d, *J* = 1.3 Hz, 1H), 8.02 (d, *J* = 8.6 Hz, 1H), 7.92 (dd, *J* = 8.6, 1.3 Hz, 1H), 7.14 (d, *J* = 8.4 Hz, 2H), 7.09 (d, *J* = 8.4 Hz, 2H), 5.80 (s, 2H), 4.52 (s, 1H), 4.32 (s, 2H), 2.92 (s, 3H). HRMS-ESI-TOF *m/z* calculated for C<sub>17</sub>H<sub>16</sub>ClN<sub>6</sub>O<sub>2</sub>S<sub>2</sub><sup>+</sup> [*M* + H<sup>+</sup>]: 435.0459, found: 435.0470.

**Compound 18: 3-(4-chlorophenethyl)amino-1-((2-methylbenzo[d]thiazol-6-yl)sulfonyl)-5-amino-1H-1,2,4-triazole**

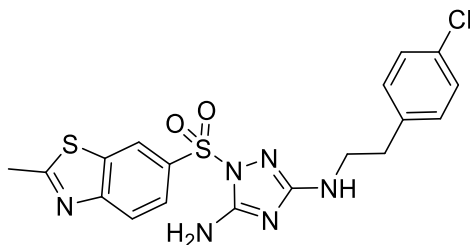

Compound **18** was prepared from 2-methyl-1,3-benzothiazole-6-sulfonyl chloride (1.2 equiv, 0.25 mmol, 62 mg) using the general procedure. Flash chromatography (SiO<sub>2</sub>) yielded the desired product as a white solid. <sup>1</sup>H NMR (DMSO-*d*<sub>6</sub>, 500 MHz) δ 8.73 (s, 1H), 8.12 (d, *J* = 8.7 Hz, 1H), 7.90 (d, *J* = 9.2 Hz, 1H), 7.23 (s, 2H), 7.19 (d, *J* = 8.1 Hz, 2H), 6.98 (d, *J* = 8.1 Hz, 2H), 6.29 (t, *J* = 6.0 Hz, 1H), 3.12 (q, *J* = 7.0 Hz, 2H), 2.84 (s, 3H), 2.62 (t, *J* = 7.1 Hz, 2H). LRMS-ESI *m/z* calculated for C<sub>18</sub>H<sub>18</sub>ClN<sub>6</sub>O<sub>2</sub>S<sub>2</sub><sup>+</sup> [*M* + H<sup>+</sup>]: 449.1, found: 449.0.

**Compound 19: 3-(4-chlorophenethyl)-1-((2-methylbenzo[d]thiazol-6-yl)sulfonyl)-5-amino-1H-1,2,4-triazole**

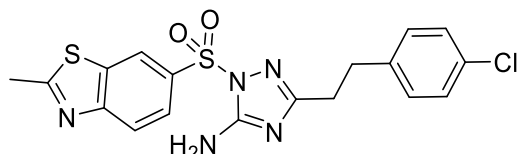

Compound **19** was prepared from 2-methyl-1,3-benzothiazole-6-sulfonyl chloride (1.2 equiv, 0.25 mmol, 62 mg) using the general procedure. Flash chromatography (SiO<sub>2</sub>, 50% EtOAc/hexanes) yielded the desired product as a white solid. <sup>1</sup>H NMR (CDCl<sub>3</sub>, 500 MHz) δ 8.51 (d, *J* = 1.8 Hz, 1H), 8.08 (d, *J* = 8.7 Hz, 1H), 7.98 (dd, *J* = 8.7, 1.8 Hz, 1H), 7.06 (d, *J* = 8.4 Hz, 2H), 6.98 (d, *J* = 8.4 Hz, 2H), 5.90 (s, 2H), 2.93 (s, 3H), 2.90 (m, 2H), 2.75 (t, *J* = 7.3 Hz, 2H). LRMS-ESI *m/z* calculated for C<sub>18</sub>H<sub>17</sub>ClN<sub>5</sub>O<sub>2</sub>S<sub>2</sub><sup>+</sup> [*M* + H<sup>+</sup>]: 434.1, found: 434.0.

**Compound 20: 3-(3-(4-chlorophenyl)propyl)-1-((2-methylbenzo[d]thiazol-6-yl)sulfonyl)-5-amino-1H-1,2,4-triazole**

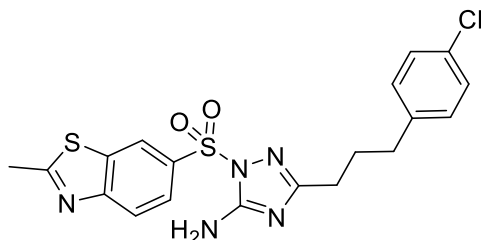

Compound **20** was prepared from 2-methyl-1,3-benzothiazole-6-sulfonyl chloride (1.2 equiv, 0.25 mmol, 62 mg) using the general procedure. Flash chromatography (SiO<sub>2</sub>, 50% EtOAc/hexanes) yielded the desired product as a white solid. <sup>1</sup>H NMR (CD<sub>2</sub>Cl<sub>2</sub>, 400 MHz) δ 8.55 (d, *J* = 1.7 Hz,

1H), 8.06 (d,  $J = 8.8$  Hz, 1H), 8.00 (dd,  $J = 8.8, 1.6$  Hz, 1H), 7.19 (d,  $J = 8.4$  Hz, 2H), 7.02 (d,  $J = 8.4$  Hz, 2H) 6.31 (s, 2H), 2.87 (s, 3H), 2.48 (m, 4H), 1.89 (m, 2H). LRMS-ESI  $m/z$  calculated for  $C_{19}H_{19}ClN_5O_2S_2^+$  [ $M + H^+$ ]: 448.1, found: 448.0.

**Compound 72: (5-amino-3-((4-chlorobenzyl)thio)-1H-1,2,4-triazol-1-yl)(4-nitrophenyl)-methanone**

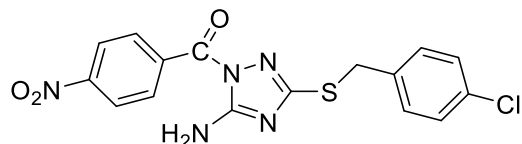

Compound **72** was prepared from 4-nitrobenzoyl chloride (1.2 equiv, 0.25 mmol, 46 mg) using the general procedure. Flash chromatography ( $SiO_2$ ) yielded the desired product as a white solid.  $^1H$  NMR ( $CDCl_3$ , 500 MHz)  $\delta$  8.31 (d,  $J = 9.0$  Hz, 2H), 8.25 (d,  $J = 9.0$  Hz, 2H), 7.32–7.26 (m, 4H), 6.56 (s, 2H), 4.23 (s, 2H). HRMS-ESI-TOF  $m/z$  calculated for  $C_{16}H_{13}ClN_5O_3S^+$  [ $M + H^+$ ]: 390.0422, found: 390.0420.

**Compound 75: (5-amino-3-((4-chlorobenzyl)thio)-1H-1,2,4-triazol-1-yl)(3-nitrophenyl)-methanone**

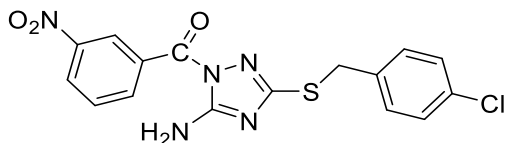

Compound **75** was prepared from 3-nitrobenzoyl chloride (1.2 equiv, 0.25 mmol, 46 mg) using the general procedure. Flash chromatography ( $SiO_2$ , 40% EtOAc/hexanes) yielded the desired product as a white solid.  $^1H$  NMR ( $DMSO-d_6$ , 500 MHz)  $\delta$  8.87 (t,  $J = 1.9$  Hz, 1H), 8.49 (ddd,  $J = 8.4, 2.3, 1.0$  Hz, 1H), 8.40 (dt,  $J = 8.0, 1.0$  Hz, 1H), 7.94 (br s, 2H), 7.85 (t,  $J = 8.0$  Hz, 1H), 7.37 (d,  $J = 8.5$  Hz, 2H), 7.33 (d,  $J = 8.5$  Hz, 2H), 4.27 (s, 2H). HRMS-ESI-TOF  $m/z$  calculated for  $C_{16}H_{13}ClN_5O_3S^+$  [ $M + H^+$ ]: 390.0422, found: 390.0427.

**Compound 76: (5-amino-3-((4-chlorobenzyl)thio)-1H-1,2,4-triazol-1-yl)(cyclohexyl)-methanone**

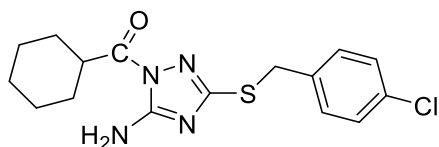

Compound **76** was prepared from cyclohexylbenzoyl chloride (1.2 equiv, 0.25 mmol, 30  $\mu$ L) using the general procedure. Flash chromatography ( $SiO_2$ ) yielded the desired product as a white solid.  $^1H$  NMR ( $CDCl_3$ , 500 MHz)  $\delta$  7.36 (d,  $J = 8.5$  Hz, 2H), 7.27 (d,  $J = 8.5$  Hz, 2H), 6.48 (br s, 2H), 4.25 (s, 2H), 3.29 (tt,  $J = 11.3, 3.4$  Hz, 1H), 2.08–1.79 (m, 6H), 1.61–1.30 (m, 4H). LRMS-ESI  $m/z$  calculated for  $C_{16}H_{20}ClN_4OS^+$  [ $M + H^+$ ]: 351.1, found: 351.3.

**Compound 78: 3-(4-chlorobenzyl)amino-1-(naphth-1-sulfonyl)-5-amino-1H-1,2,4-triazole**

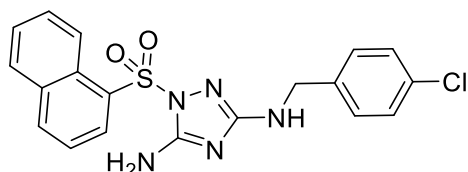

Compound **78** was prepared from naphthalene-1-sulfonyl chloride (1.2 equiv, 0.25 mmol, 61 mg) using the general procedure. Flash chromatography (SiO<sub>2</sub>, 60% EtOAc/hexanes) yielded the desired product as a white solid. <sup>1</sup>H NMR (DMSO-*d*<sub>6</sub>, 500 MHz) δ 8.72 (d, *J* = 8.5 Hz, 1H), 8.37 (d, *J* = 8.2 Hz, 1H), 8.30 (d, *J* = 7.5 Hz, 1H), 8.12 (d, *J* = 8.2 Hz, 1H), 7.77–7.57 (m, 3H), 7.26 (s, 2H), 7.16 (d, *J* = 8.3 Hz, 2H), 7.04 (d, *J* = 8.3 Hz, 2H), 6.72 (t, *J* = 6.4 Hz, 1H), 4.06 (d, *J* = 6.3 Hz, 2H). LRMS-ESI *m/z* calculated for C<sub>19</sub>H<sub>17</sub>ClN<sub>5</sub>O<sub>2</sub>S<sup>+</sup> [*M* + H<sup>+</sup>]: 414.1, found: 414.0.

The structure of **78** was confirmed with an X-ray crystal structure (CDCC 1825323; **Supplementary Table 8**).

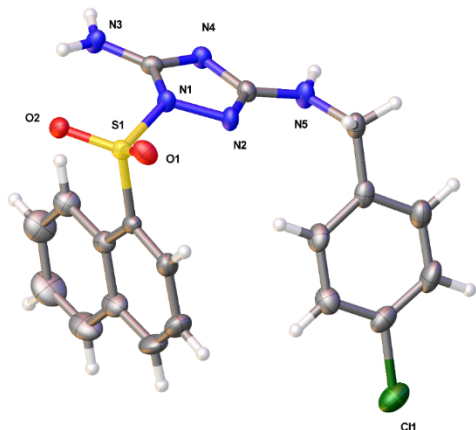

**Compound 80: 3-(4-chlorobenzyl)amino-1-((4-methoxyphenyl)sulfonyl)-5-amino-1*H*-1,2,4-triazole**

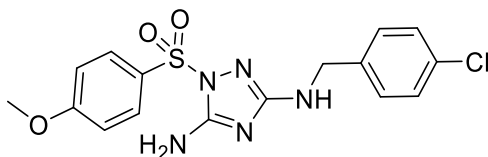

Compound **80** was prepared from 4-methoxyphenylsulfonyl chloride (1.2 equiv, 0.25 mmol, 58 mg) using the general procedure. Flash chromatography (SiO<sub>2</sub>) yielded the desired product as a white solid. <sup>1</sup>H NMR (CDCl<sub>3</sub>, 500 MHz) δ 7.78 (d, *J* = 9.1 Hz, 2H), 7.32 (d, *J* = 8.3 Hz, 2H), 7.24 (d, *J* = 8.3 Hz, 2H), 6.94 (d, *J* = 9.1 Hz, 2H), 6.56 (t, *J* = 6.1 Hz, 1H), 4.58 (d, *J* = 6.1 Hz, 2H), 3.88 (s, 3H). LRMS-ESI *m/z* calculated for C<sub>16</sub>H<sub>17</sub>ClN<sub>5</sub>O<sub>3</sub>S<sup>+</sup> [*M* + H<sup>+</sup>]: 394.1, found: 394.0.

**Compound 88: 1-(benzo[*d*]thiazol-6-ylsulfonyl)-3-(4-chlorophenethyl)-5-amino-1*H*-1,2,4-triazole**

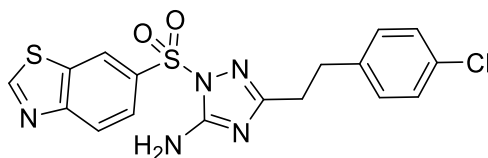

Compound **88** was prepared from 1,3-benzothiazole-6-sulfonyl chloride (1.2 equiv, 0.25 mmol, 58 mg) using the general procedure. Flash chromatography (SiO<sub>2</sub>, 40% EtOAc/hexanes) yielded the desired product as a white solid. <sup>1</sup>H NMR (DMSO-*d*<sub>6</sub>, 400 MHz) δ 9.74 (s, 1H), 8.98 (d, *J* = 1.7 Hz, 1H), 8.34 (d, *J* = 8.7 Hz, 1H), 7.99 (dd, *J* = 8.7, 1.7 Hz, 1H), 7.33 (s, 2H), 7.07 (d, *J* = 8.4 Hz, 2H), 7.03 (d, *J* = 8.4 Hz, 2H), 2.80 (t, *J* = 7.4 Hz, 2H), 2.62 (t, *J* = 7.4 Hz, 2H). LRMS-ESI *m/z* calculated for C<sub>17</sub>H<sub>15</sub>ClN<sub>5</sub>O<sub>2</sub>S<sub>2</sub><sup>+</sup> [*M* + H<sup>+</sup>]: 420.0, found: 420.0.
